# Supplementary material for: Phototriggered formation and disappearance of surface-confined self-assembly composed of photochromic 2-thienyl-type diarylethene: a cooperative model at the liquid/solid interface
Source: Royal Society of Chemistry journal article supplement (doi:10.1039/c3cc48895k), 2014-01-01
Supplement: c3cc48895k1.pdf [file c3cc48895k1.pdf]

## Supplementary Information

# Phototriggered Formation and Disappearance of Surface-Confined Self-Assembly Composed of Photochromic 2-Thienyl-Type Diarylethene: A Cooperative Model at the Liquid/Solid Interface

Soichi Yokoyama, Takashi Hirose and Kenji Matsuda\*

*Department of Synthetic Chemistry and Biological Chemistry, Graduate School of Engineering, Kyoto University, Katsura, Nishikyo-ku, Kyoto 615-8510, Japan*

E-mail: kmatsuda@sbchem.kyoto-u.ac.jp

### Contents:

#### Experimental Details

|                                                                        |    |
|------------------------------------------------------------------------|----|
| A. Syntheses of Materials                                              | S1 |
| B. UV-vis. Spectroscopy and Photochemical Reaction                     | S5 |
| C. STM Measurements                                                    | S5 |
| D. Molecular Modeling                                                  | S5 |
| E. Langmuir Adsorption-Based Cooperative Assembly Model on 2-D Surface | S5 |

#### Supporting Data

|                                                                                                                                |     |
|--------------------------------------------------------------------------------------------------------------------------------|-----|
| <b>Fig. S1</b> UV-vis spectral change of <b>1</b> in CH <sub>2</sub> Cl <sub>2</sub> and octanoic acid upon photoisomerization | S8  |
| <b>Fig. S2</b> Another high resolution STM images of <b>1o</b> at octanoic acid/HOPG interface                                 | S9  |
| <b>Fig. S3</b> STM image of <b>1o</b> at various concentrations                                                                | S10 |
| <b>Fig. S4</b> Histograms of surface coverage of <b>1o</b> around the critical concentration                                   | S11 |
| <b>Fig. S5</b> STM images of <b>1o</b> at high concentrations (> 750 μM)                                                       | S12 |
| <b>Fig. S6</b> Histograms of domain sizes of <b>1o</b> on HOPG surface at high concentrations (> 750 μM)                       | S13 |
| <b>Fig. S7</b> The plot of average domain size over concentration of <b>1o</b>                                                 | S14 |
| <b>Fig. S8</b> Concentration dependence of the fractional coverage of <b>1c</b> at the octanoic acid/HOPG interface            | S15 |
| <b>Fig. S9</b> Dependence of conversion ratio of <b>1o</b> on surface coverage on HOPG surface                                 | S16 |
| <b>Fig. S10</b> Dependence of conversion ratio of <b>1o</b> on surface coverage on HOPG surface                                | S17 |
| <b>Fig. S11</b> Molecular orientation of <b>1o</b> in respect to the HOPG lattice                                              | S18 |
| <b>Fig. S12-S23</b> <sup>1</sup> H and <sup>13</sup> C NMR spectra of compounds <b>5–7</b> and <b>1–3</b>                      | S19 |

#### References

S31

## Experimental details

### A. Syntheses of the materials

**General.** Unless specifically mentioned, reagents and solvents were obtained from commercial suppliers and used without further purification. All reactions were monitored by thin-layer chromatography carried out on 0.2 mm Merck silica gel plates (60F-254). Column chromatography was performed on silica gel (Nakarai Tesque, 70-230 mesh for normal phase or 75C18-OPN, 75  $\mu$ m for reverse phase) or on a Biotage Instrument (Isolera One) with a SNAP flash silica gel cartridge (KP-Sil). Final product was purified by a preparative gel permeation chromatography (GPC) (Japan Analytical Industry Co., Ltd., JAIGEL-1H and 2H).  $^1\text{H}$  and  $^{13}\text{C}$  NMR spectra were recorded on a JEOL JMN-A500 or JNM-ECA600 instruments. Proton and carbon chemical shifts are reported in ppm downfield from tetramethylsilane (TMS). Mass spectra were obtained by a Thermo Scientific LTQ orbitrapXL mass spectrometer. IR spectra were recorded on a Jasco FT/IR-4200 equipped with an ATR detector PRO450-S (Ge crystal). *N,N*-dimethylformamide was dried with calcium hydride and distilled before use. Compounds **4**<sup>S1</sup> and **5a**<sup>S2</sup> have been prepared according to a literature procedure. Triethyl ammonium formic acid (TEAF) was prepared as follows: triethylamine (16.2 g, 0.16 mol) was slowly added dropwise to formic acid (18.4 g, 0.40 mol) during cooling and stirring.<sup>S3</sup>

### Scheme S1. Synthesis of **1o**, **2o**, and **3o**

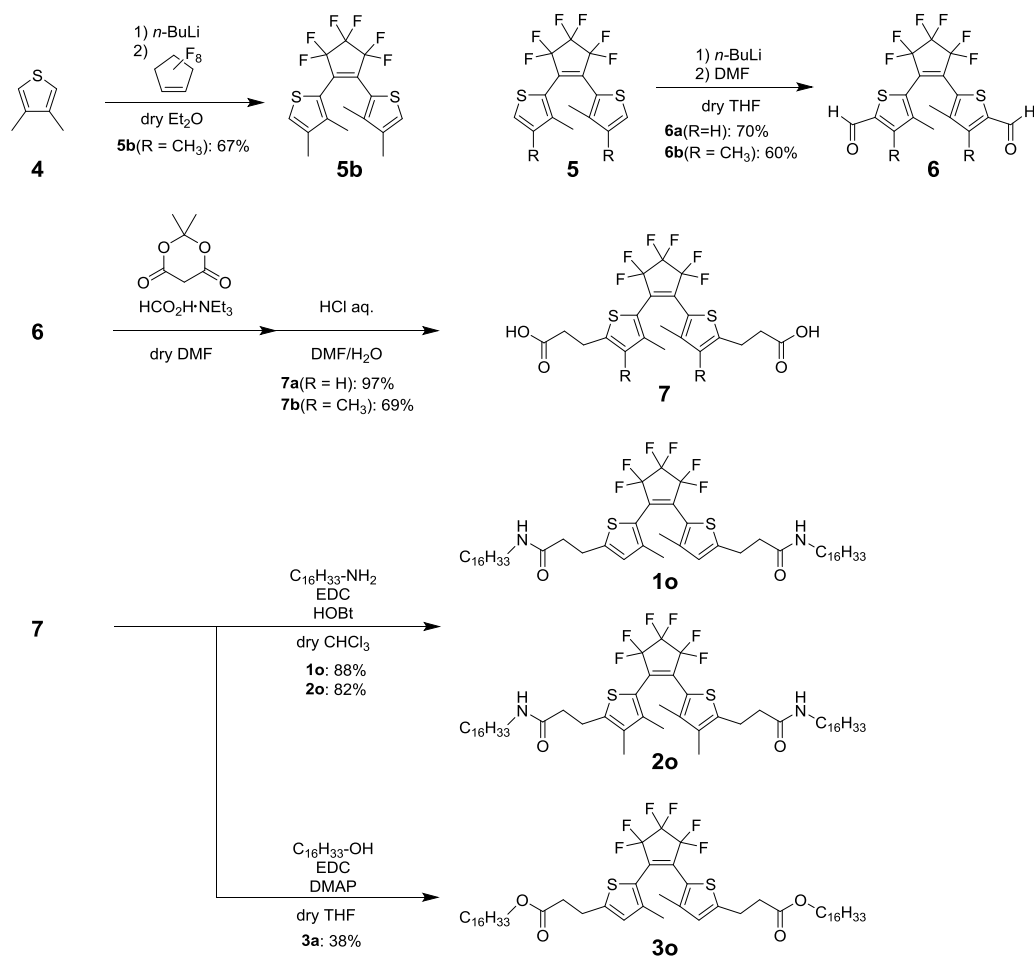

*Synthesis of 1,2-bis(3,4-dimethyl-2-thienyl)hexafluorocyclopentene (5b)*

To a solution of 3,4-dimethylthiophene **4**<sup>S1</sup> (5.61 g, 50.0 mmol) in dry Et<sub>2</sub>O (150 mL) was slowly added dropwise *n*-BuLi (1.6 M in hexanes, 32.0 mL, 51.2 mmol) at 0 °C under nitrogen atmosphere for 30 min. The mixture was stirred at room temperature for 30 min and refluxed for 30 min. The resulting mixture was cooled to 0 °C. Then perfluorocyclopentene (3.3 mL, 25 mmol) was added by a cooled syringe for 30 min under nitrogen atmosphere with keeping below 10 °C. After stirring at 0 °C for 1 h, the reaction was quenched by an addition of aq. HCl (1 N, 50 mL). The mixture was extracted with Et<sub>2</sub>O and combined organic layers were dried over MgSO<sub>4</sub>, filtered, and evaporated. The crude product was purified by silica gel column chromatography (hexane) to give a yellow solid **5b** (6.57 g, 16.6 mmol, 67%).

**5b**: <sup>1</sup>H NMR (500 MHz, CDCl<sub>3</sub>): δ 1.66 (s, 6H), 2.08 (s, 6H), 7.11 (s, 2H); IR (Ge ATR, neat): ν<sub>max</sub> 2952, 1607, 1472, 1441, 1376, 1335, 1266, 1191, 1161, 1110, 1056 cm<sup>-1</sup>; HRMS (MALDI-orbitrap) *m/z* [M]<sup>+</sup> calcd for C<sub>17</sub>H<sub>14</sub>F<sub>6</sub>O<sub>4</sub>S<sub>2</sub><sup>+</sup>: 396.0436, found: 396.0426.

*Synthesis of 1,2-bis(5-formyl-3-methyl-2-thienyl)hexafluorocyclopentene (6a)*

To a solution of **5a**<sup>S2</sup> (10.0 g, 27.2 mmol) in dry THF (100 mL) was slowly added dropwise *n*-BuLi (1.6 M in hexanes, 37.5 mL, 60.0 mmol) at -78 °C under nitrogen atmosphere. The mixture was stirred at -78 °C for 30 min and further stirred at 0 °C for 30 min. After addition of *N,N*-dimethylformamide (1.0 mL, 13 mmol) at 0 °C by one portion, the reaction mixture was stirred at room temperature for 1 h. The reaction was quenched with aq. HCl (12 N, 3.0 mL). The reaction product was extracted with Et<sub>2</sub>O twice, and combined organic layers were washed with brine, dried over MgSO<sub>4</sub>, filtered, and evaporated. The crude product was purified by silica gel column chromatography (gradient eluting from hexane/CH<sub>2</sub>Cl<sub>2</sub> = 1/1 to CH<sub>2</sub>Cl<sub>2</sub>) to give a yellow solid. The solid was recrystallized from hexane to yield a pale yellow solid **6a** (8.08 g, 19.0 mmol, 70%).

**6a**: <sup>1</sup>H NMR (500 MHz, CDCl<sub>3</sub>): δ 1.91 (s, 6H), 7.52 (s, 2H), 9.88 (s, 2H); IR (Ge ATR, neat): ν<sub>max</sub> 1667, 1539, 1455, 1394, 1342, 1272, 1231, 1198, 1158, 1127, 1067, 1037, 1011 cm<sup>-1</sup>; HRMS (MALDI-orbitrap) *m/z* [M + H]<sup>+</sup> calcd for C<sub>17</sub>H<sub>11</sub>F<sub>6</sub>O<sub>2</sub>S<sub>2</sub><sup>+</sup>: 425.0099, found: 425.0104.

*Synthesis of 1,2-bis(3,4-dimethyl-5-formyl-2-thienyl)hexafluorocyclopentene (6b)*

To a solution of **5a** (0.500 g, 1.26 mmol) in dry THF (25 mL) was slowly added dropwise *n*-BuLi (1.6 M in hexanes, 38 mL, 61 mmol) at 0 °C under nitrogen atmosphere. The mixture was stirred at 0 °C for 30 min and further stirred at room temperature for 20 min. After addition of *N,N*-dimethylformamide (8.0 mL, 100 mmol) at 0 °C by one portion, the reaction mixture was stirred at room temperature for 1 h. Then the reaction was quenched with aq. HCl (1 N, 10 mL). The reaction product was extracted with Et<sub>2</sub>O twice, and combined organic layers were washed with brine, dried over MgSO<sub>4</sub>, filtered, and evaporated. The crude product was purified by silica gel column chromatography (gradient eluting from hexane/CH<sub>2</sub>Cl<sub>2</sub> = 1/1 to CH<sub>2</sub>Cl<sub>2</sub>) to give a yellow solid **6b** (0.341 g, 0.754 mmol, 60%).

**6b**: <sup>1</sup>H NMR (500 MHz, CDCl<sub>3</sub>): δ 1.80 (s, 6H), 2.43 (s, 6H), 1.99 (quint, *J* = 6.5 Hz, 2H), 10.07 (s, 2H); IR (Ge ATR, neat): ν<sub>max</sub> 1682, 1663, 1271, 1238, 1196, 1057 cm<sup>-1</sup>; HRMS (MALDI-orbitrap) *m/z* [M + H]<sup>+</sup> calcd for C<sub>19</sub>H<sub>15</sub>F<sub>6</sub>O<sub>2</sub>S<sub>2</sub><sup>+</sup>: 453.0412, found: 453.0414.

*Synthesis of 1,2-bis(5-(2-carboxyethyl)-3-methyl-2-thienyl)hexafluorocyclopentene (7a)*

To a solution of **6a** (4.24 g, 10.0 mmol) in TEAF<sup>S3</sup> (50 mL) and DMF (50 mL) was added Meldrum's acid (2.90 g, 20.1 mmol). The mixture was slowly heated to 100 °C over 1 h and was stirred for 5 h at the temperature. The resulting solution was then cooled to room temperature and the reaction was quenched by an addition of cooled water (100 g). The solution was acidified with concentrated aq. HCl until pH became 1. The reaction product was extracted with Et<sub>2</sub>O. Combined organic layers were then extracted with aq. NaOH (1 N) and the aqueous layer was washed with Et<sub>2</sub>O. The aqueous layer was again acidified with concentrated aq. HCl until pH became 1. The generated precipitates were collected by filtration, dried under reduced pressure to give a pale yellow solid **7a** (4.95 g, 9.65 mmol, 97%).

**7a**: <sup>1</sup>H NMR (500 MHz, CDCl<sub>3</sub>): δ 2.02 (s, 6H), 2.67 (t, *J* = 6.5 Hz, 4H), 3.11 (t, *J* = 6.5 Hz, 4H), 6.61 (s, 2H); IR (Ge ATR, neat):  $\nu_{\max}$  1709, 1604, 1474, 1440, 1385, 1361, 1335, 1314, 1268, 1225, 1192, 1118, 1065 cm<sup>-1</sup>; HRMS (MALDI-orbitrap) *m/z* [M]<sup>+</sup> calcd for C<sub>21</sub>H<sub>18</sub>F<sub>6</sub>O<sub>4</sub>S<sub>2</sub><sup>+</sup>: 512.0545, found: 512.0546.

*Synthesis of 1,2-bis(5-(2-carboxyethyl)-3,4-dimethyl-2-thienyl)hexafluorocyclopentene (7b)*

To a solution of **6b** (0.274 g, 0.600 mmol) in TEAF<sup>S3</sup> (5 mL) and DMF (5 mL) was added Meldrum's acid (0.174 g, 1.21 mmol). The mixture was stirred for 5 h at 100 °C. The resulting solution was then cooled to room temperature and the reaction was quenched by an addition of cooled water (10 g). The solution was acidified with concentrated aq. HCl until pH became 1. The reaction product was extracted with Et<sub>2</sub>O and CH<sub>2</sub>Cl<sub>2</sub>. Combined organic layers were washed with water, dried over MgSO<sub>4</sub>, filtered, and evaporated. The crude product was purified by silica gel column chromatography (CH<sub>2</sub>Cl<sub>2</sub>/MeOH = 9/1) and reversed phase chromatography (MeOH/H<sub>2</sub>O = 7/3) to give a pale yellow solid **7b** (0.223 g, 0.413 mmol, 69%).

**7b**: <sup>1</sup>H NMR (500 MHz, CDCl<sub>3</sub>): δ 2.93 (s, 6H), 2.00 (s, 6H), 2.65 (t, *J* = 7.0 Hz, 4H), 3.07 (t, *J* = 7.0 Hz, 4H), 8.78 (s, 2H); IR (Ge ATR, neat):  $\nu_{\max}$  2923, 2852, 1710, 1441, 1330, 1273, 1125 cm<sup>-1</sup>; HRMS (MALDI-orbitrap) *m/z* [M]<sup>+</sup> calcd for C<sub>23</sub>H<sub>22</sub>F<sub>6</sub>N<sub>2</sub>O<sub>4</sub>S<sub>2</sub><sup>+</sup>: 540.0858, found 540.0860.

*Synthesis of 1,2-bis(5-(N-hexadecyl-2-carbamoyl)ethyl)-3-methyl-2-thienyl)hexafluoropentene (1o)*

To a dispersed solution of **7a** (0.205 g, 0.400 mmol) in dry CHCl<sub>3</sub> (20 mL) were added hexadecylamine (0.338 g, 1.40 mmol), 1-ethyl-3-(3-dimethylaminopropyl)carbodiimide hydrochloride (0.345 g, 1.80 mmol) and 1-hydroxybenzotriazole (0.111 g, 0.821 mmol). The mixture was stirred for 2 h at room temperature. The reaction mixture was extracted with CH<sub>2</sub>Cl<sub>2</sub>. Combined organic layers were washed with water, dried over MgSO<sub>4</sub>, filtered, and evaporated. The crude product was purified by silica gel column chromatography (ethyl acetate/CHCl<sub>3</sub> = 4/1) to give a pale yellow solid **1o** (0.337 g, 0.352 mmol, 88%).

**1o**: <sup>1</sup>H NMR (500 MHz, CDCl<sub>3</sub>): δ 0.88 (t, *J* = 7.0 Hz, 6H), 1.25-1.31 (m, 52H), 1.45 (quint, *J* = 6.7 Hz, 4H), 1.71 (s, 6H), 2.48 (t, *J* = 7.3 Hz, 4H), 3.12 (t, *J* = 7.3 Hz, 4H), 3.22 (q, *J* = 6.4 Hz, 4H), 5.56 (t, *J* = 5.5 Hz, 2H), 6.57 (s, 2H); <sup>13</sup>C NMR (151MHz, CDCl<sub>3</sub>): δ 14.1, 15.1, 22.6, 25.9, 26.9, 29.27, 29.32, 29.5, 29.57, 29.61, 29.7, 31.8, 37.9, 39.7, 108.9-12.8 (m), 115.6 (tt, *J* = 260 and 24Hz), 121.1, 128.8, 133.8 (t, *J* = 24 Hz), 141.1, 148.0, 170.9; IR (Ge ATR, neat):  $\nu_{\max}$  2959, 2919, 2850, 1634, 1468, 1384, 1271, 1191, 1130 cm<sup>-1</sup>; HRMS (MALDI-orbitrap) *m/z* [M + H]<sup>+</sup> calcd for C<sub>53</sub>H<sub>85</sub>F<sub>6</sub>N<sub>2</sub>O<sub>2</sub>S<sub>2</sub><sup>+</sup>: 959.5951, found 959.5966; UV-vis (CH<sub>2</sub>Cl<sub>2</sub>):  $\lambda_{\max}$  ( $\epsilon$ /M<sup>-1</sup>cm<sup>-1</sup>) 343(1.2 × 10<sup>4</sup>) nm.

*Synthesis of 1,2-bis(3,4-dimethyl-5-(N-hexadecyl-2-carbamoyl)ethyl)-2-thienyl)hexafluorocyclopentene (2o)*

To a dispersed solution of **7b** (0.200 g, 0.370 mmol) in dry CHCl<sub>3</sub> (20 mL) were added hexadecylamine (0.314 g, 1.30 mmol), 1-ethyl-3-(3-dimethylaminopropyl)carbodiimide hydrochloride (0.320 g, 1.67 mmol) and 1-hydroxybenzotriazole (0.100 g, 0.740 mmol). The mixture was stirred for 2 h at room temperature. The solvent was removed *in vacuo*, and then saturated NaHCO<sub>3</sub> aqueous solution was added to the residue. The reaction mixture was extracted with CH<sub>2</sub>Cl<sub>2</sub>, combined organic layers were washed with water, dried over MgSO<sub>4</sub>, filtered, and evaporated. The crude product was purified by silica gel column chromatography (ethyl acetate/CHCl<sub>3</sub> = 4/1) to give a pale yellow solid **2o** (0.301 g, 0.305 mmol, 82%).

**2o**: <sup>1</sup>H NMR (500 MHz, CDCl<sub>3</sub>): δ 0.88 (t, *J* = 6.5 Hz, 6H), 1.25-1.31 (m, 52H), 1.45 (quint, 6.5 Hz, 4H), 1.60 (s, 6H), 1.98 (s, 6H), 2.47 (t, *J* = 7.5 Hz, 4H), 3.10 (t, *J* = 7.5 Hz, 4H), 3.21 (q, *J* = 6.5 Hz, 4H), 5.65 (s, 2H); <sup>13</sup>C NMR (151 MHz, CDCl<sub>3</sub>): δ 12.5, 14.1, 14.2, 22.6, 24.3, 26.9, 29.26, 29.31, 29.50, 29.53, 29.56, 29.61, 29.65, 31.90, 37.5, 39.67, 108.9-112.8 (m), 115.7 (tt, *J* = 260 and 24 Hz), 119.7, 134.1, 134.2-134.4 (m), 140.9, 141.7, 171.0; IR (Ge ATR, neat): ν<sub>max</sub> 3291, 2919, 2849, 1640, 1550, 1470, 1271, 1190, 1060 cm<sup>-1</sup>; HRMS (MALDI-orbitrap) *m/z* [M + H]<sup>+</sup> calcd for C<sub>55</sub>H<sub>89</sub>F<sub>6</sub>N<sub>2</sub>O<sub>2</sub>S<sub>2</sub><sup>+</sup>: 987.6264, found 987.6268.

*Synthesis of 1,2-bis(5-(1-hexadecylpropanate-3-yl)-3-methyl-2-thienyl)perfluorocyclopentene (3o)*

To a solution of **7a** (0.256 g, 0.500 mmol) in dry THF (25 mL) were added hexadecanol (0.424 g, 1.75 mmol), 1-ethyl-3-(3-dimethylaminopropyl) carbodiimide hydrochlorid (0.211 g, 1.10 mmol), and 4-dimethylaminopyridine (DMAP) (61.1 mg, 0.500 mmol). The mixture was stirred for 2 days at room temperature. The reaction mixture was extracted with Et<sub>2</sub>O. Combined organic layers were washed with aq. HCl (1 N) and saturated aq. NaHCO<sub>3</sub>, dried over Na<sub>2</sub>SO<sub>4</sub>, filtrated, and evaporated. The crude product was purified by silica gel column chromatography (CH<sub>2</sub>Cl<sub>2</sub>/hexane = 1:1) to give a pale yellow solid **3o** (0.185 g, 0.192 mmol, 38%).

**3o**: <sup>1</sup>H NMR (500 MHz, CDCl<sub>3</sub>): δ 0.88 (t, *J* = 7.0 Hz, 6H), 1.26-1.30 (m, 52H), 1.61 (quint, *J* = 7.5 Hz, 4H), 1.67 (s, 6H), 2.66 (t, 4H), 3.09 (t, *J* = 7.5 Hz, 4H), 4.08 (t, *J* = 6.8 Hz, 4H), 6.57 (s, 1H); <sup>13</sup>C NMR (151 MHz, CDCl<sub>3</sub>): δ 14.1, 15.1, 22.7, 25.3, 25.9, 28.6, 29.2, 29.3, 29.5, 29.6, 29.62, 29.64, 29.7, 31.9, 35.6, 64.9, 110.8 (tquint, *J* = 270 and 25 Hz), 115.6 (tt, 260 and 24 Hz), 121.3, 128.6, 133.8 (t, *J* = 24 Hz) 141.1, 147.4, 172.0; IR (Ge ATR, neat): ν<sub>max</sub> 2916, 2850, 1734, 1473, 1363, 1341, 1275, 1187, 1122, 1065 cm<sup>-1</sup>; HRMS (MALDI-orbitrap) *m/z* [M]<sup>+</sup> calcd for C<sub>53</sub>H<sub>83</sub>F<sub>6</sub>O<sub>4</sub>S<sub>2</sub><sup>+</sup>: 960.5553, found: 960.5557

*Synthesis of 4,9-bis(N-hexadecyl-2-carbamoyl)ethyl)-6,7-dimethyl-13,13,14,14,15,15-hexafluorotetracyclo[10.3.0.0(2,6).0(7,11)]-3,10-dithiapentadeca-1,4,8,11-tetraene (1c)*

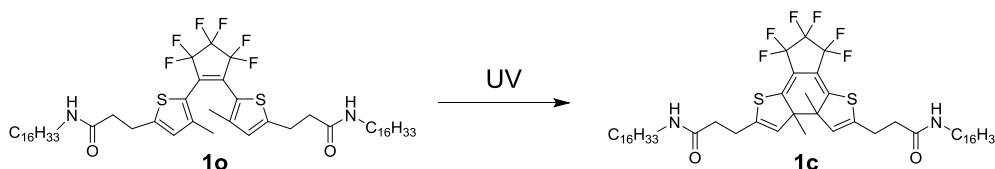

In a quartz flask, a solution of **1o** (100 mg) in acetone was irradiated by UV light (365 nm) for 1 h with stirring. The solvent was evaporated *in vacuo*. The mixture was isolated by silica gel column chromatography (ethyl acetate/CHCl<sub>3</sub> = 1/1) in a dark room to give an orange solid **1c** (25 mg, 0.10 mmol, 25 %).

**1c**:  $^1\text{H}$  NMR (500 MHz,  $\text{CDCl}_3$ ):  $\delta$  0.88 (t,  $J = 7.3$  Hz, 6H), 1.25-1.28 (m, 52H), 1.34 (s, 6H), 1.48 (quint,  $J = 7.0$  Hz, 4H), 2.37 (t,  $J = 7.3$  Hz, 4H), 2.64-2.75 (m, 4H), 3.17-3.28 (m, 4H), 5.37 (s, 2H), 5.43 (t,  $J = 5.5$  Hz, 2H); HRMS (MALDI-orbitrap)  $m/z$   $[\text{M} + \text{H}]^+$  calcd for  $\text{C}_{53}\text{H}_{85}\text{F}_6\text{N}_2\text{O}_2\text{S}_2^+$ : 959.5951, found 959.5938; UV-vis ( $\text{CH}_2\text{Cl}_2$ ):  $\lambda_{\text{max}}$  ( $\epsilon/\text{M}^{-1}\text{cm}^{-1}$ ) 436 ( $6.3 \times 10^3$ ) nm.

## B. UV-vis. Spectroscopy and Photochemical Reaction

Absorption spectra were measured on a spectrophotometer (HITACHI U-3310). Optical length of the quartz cells were 10 mm or 2.0 mm. Photoirradiation experiments on HOPG surface were performed by a MUV-202U (MORITEX Co.) Xe/Hg lamp with a sharp cut filter (UV-29) and bandpass filter (U340) for UV light ( $0.64 \text{ W/cm}^2$ ,  $\lambda = 290\text{-}360$  nm), and with sharp cut filters (U-29 and Y-44) for visible light ( $0.32 \text{ W/cm}^2$ ,  $\lambda > 440$  nm). Conversion-ratio determined solutions of **1o** were prepared by a USHIO 500 W super high pressure mercury lamp with combination of a thermal cut, sharp cut (U-29), and bandpass filters (U330).

## C. STM measurement

All STM experiments were performed at room temperature and ambient conditions. The STM images were acquired with a PicoSPM instrument (Molecular Imaging co.) or an Agilent technologies 5500 scanning probe microscopes in the constant current mode. The STM tips used in this research were mechanically cut from a Pt/Ir (80/20, diameter 0.25 mm) wire. Highly oriented pyrolytic graphite (HOPG) (purchased from the Bruker Co.) was used as a substrate. Solutions of **1o** and **1c** in 1-octanoic acid for the STM measurements were prepared by mixing into the solvent under heating. A drop of the solution (8-10  $\mu\text{L}$ ) was deposited onto freshly cleaved HOPG, and the tip was immersed into the solution and then the image was scanned. STM images were analyzed by using the graphite substrate as a calibration grid. For the experiment of the dependence of surface coverage on conversion ratio, a mother solution of diarylethene **1o** in octanoic acid were prepared at a concentration of 400  $\mu\text{M}$ . The conversion ratio of sample solutions were determined by absorption spectra after ex situ UV irradiation. Surface coverage at each conversion ratio was obtained from the STM image of the sample whose conversion ratio was predetermined. The total area of STM image was  $1.0 \times 10^7 \text{ nm}^2$  in the region of conversion ratio at which the change of surface coverage is prominent (i.e. from 40 to 60 %) and  $5.0 \times 10^6 \text{ nm}^2$  in the region of the other concentration.

## D. Molecular Modeling

The molecular ordering adsorbed on HOPG surface was modeled by a molecular mechanics/molecular dynamics (MM/MD) approach using Materials Studio v6.1.0, Accelrys Software Inc. The Dreiding force field implemented in the Forcite module was used for MM and MD calculations. The initial geometries were inspired from experimentally observed high resolution STM images for each ordering. For HOPG substrate, only one layer of graphene sheet (C-C bond length is 1.42 Å, flat geometry having hexagonal symmetry) was assumed. The Cartesian position of the graphene sheet was fixed during MM/MD calculations to suppress deformation/distortion of substrate.

### E. Langmuir Adsorption-Based Cooperative Assembly Model on 2-D Surface

In order to simulate a monolayer formation of organic compound at a liquid/solid interface, this model is based on the Langmuir adsorption model in which uniform active sites are assumed. Inspired by cooperative self-assembly model in a solution (i.e.  $K_2$ - $K$  model),<sup>S4</sup> we assumed two processes for ordering formation having different equilibrium constants; an initial nucleation on a substrate described by the nucleation constant  $K_n$  followed by subsequent stepwise elongation processes described by the elongation constant  $K_e$ .

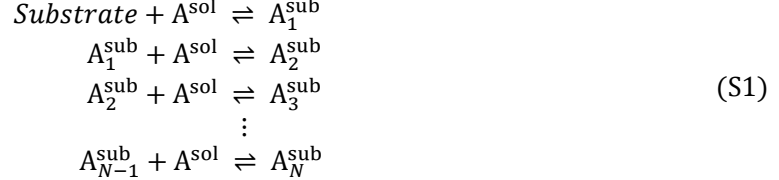

At the nucleation step in eqn (S1), a molecule in a supernatant solution,  $A^{\text{sol}}$ , adsorbs on substrate making a nucleus on the substrate,  $A_1^{\text{sub}}$ . The rate of nucleation is proportional to the number of active sites (i.e.  $(1 - \theta) \frac{A_{\text{sub}}}{S}$ ) and concentration in supernatant solution (i.e.  $[A^{\text{sol}}]$ ), while the rate of desorption of the nuclei  $A_1^{\text{sub}}$  is proportional to the number of nuclei on surface (i.e.  $[A_1^{\text{sub}}]LN_A$ ). Therefore temporal differentiation of  $[A_1^{\text{sub}}]$  is given by:

$$\frac{d[A_1^{\text{sub}}]}{dt} = k_n \cdot (1 - \theta) \frac{A_{\text{sub}}}{S} \cdot [A^{\text{sol}}] - k_{-n} \cdot [A_1^{\text{sub}}]LN_A \tag{S2}$$

where  $k_n$  and  $k_{-n}$  are nucleation rate constants of adsorption and desorption whose units are  $M^{-1}s^{-1}$  and  $s^{-1}$ , respectively,  $\theta$  is fractional coverage of surface area,  $A_{\text{sub}}$  is the total area of substrate,  $S$  is occupied area by a molecular component  $A$  on surface,  $L$  is volume of supernatant solution, and  $N_A$  is Avogadro constant. By considering the number of active sites and nuclei in the temporal differentiation, we can deal with the adsorption/desorption rate constants equivalently. Assuming steady-state approximation,  $[A_1^{\text{sub}}]$  is given by:

$$[A_1^{\text{sub}}] = \frac{(1 - \theta) A_{\text{sub}}}{LN_A S} K_n [A^{\text{sol}}] \tag{S3}$$

where nucleation constant  $K_n$  is defined as the ratio of  $k_n/k_{-n}$ . Since the subsequent elongation process in eqn (S1) is described as incremental addition of monomer from supernatant solution to  $N$ -mer domain, following differential equations are satisfied:

$$\begin{aligned}
 \frac{d[A_2^{\text{sub}}]}{dt} &= k_e \cdot [A_1^{\text{sub}}]LN_A \cdot [A^{\text{sol}}] - k_{-e} \cdot [A_2^{\text{sub}}]LN_A \\
 &\vdots \\
 \frac{d[A_N^{\text{sub}}]}{dt} &= k_e \cdot [A_{N-1}^{\text{sub}}]LN_A \cdot [A^{\text{sol}}] - k_{-e} \cdot [A_N^{\text{sub}}]LN_A
 \end{aligned} \tag{S4}$$

where  $k_e$  and  $k_{-e}$  are elongation rate constants of adsorption and desorption whose units are  $M^{-1}s^{-1}$  and  $s^{-1}$ , respectively. Assuming steady-state approximation, the molar concentration of  $N$ -mer domains on substrate is given by:

$$[A_N^{\text{sub}}] = \frac{(1 - \theta) A_{\text{sub}}}{LN_A S} \sigma (K_e [A^{\text{sol}}])^N \tag{S5}$$

where elongation constant  $K_e$  is defined as the ratio of  $k_e/k_{-e}$  and the parameter of  $\sigma$  is degree of cooperativity defined as the ratio of  $K_n/K_e$ , the latter of which is smaller than unity for a cooperative process. Note that eqn (S3) can be observed from eqn (S5) by substituting  $N$  with 1. The total molar concentration of component  $A$  on the substrate,  $c_t^{\text{sub}}$ , is given by:

$$\begin{aligned}
c_t^{\text{sub}} &= [A_1^{\text{sub}}] + 2[A_2^{\text{sub}}] + 3[A_3^{\text{sub}}] + \dots + N[A_N^{\text{sub}}] + \dots \\
&= \sum_{i=1}^{\infty} i \cdot \frac{(1-\theta) A_{\text{sub}}}{LN_A S} \sigma (K_e [A^{\text{sol}}])^i \\
&= \frac{(1-\theta) A_{\text{sub}}}{LN_A S} \frac{\sigma K_e [A^{\text{sol}}]}{(1 - K_e [A^{\text{sol}}])^2}
\end{aligned} \tag{S6}$$

where  $K_e [A^{\text{sol}}] < 1$  is assumed to approximate the form of infinite series. Concentration change in supernatant solution upon the adsorption/desorption events is taken into account by introducing the mass balance equation (S6) and the volume of supernatant solution  $L$  in this model. Since the fractional coverage  $\theta$  is the ratio of the occupied area with component A to the total area of substrate,  $\theta$  is given by:

$$\theta = \frac{c_t^{\text{sub}} \cdot L \cdot N_A \cdot S}{A_{\text{sub}}} \tag{S7}$$

Combining eqns (S6) and (S7) yields eqn (S8):

$$\theta = (1 - \theta) \frac{\sigma K_e [A^{\text{sol}}]}{(1 - K_e [A^{\text{sol}}])^2} \tag{S8}$$

Total concentration of A in the system,  $c_t$ , is given by:

$$c_t = [A^{\text{sol}}] + c_t^{\text{sub}} \tag{S9}$$

Combining eqns (S7) and (S9) yields eqn (S10)

$$c_t = [A^{\text{sol}}] + \alpha \theta, \text{ where } \alpha = \frac{A_{\text{sub}}}{L \cdot N_A \cdot S} \tag{S10}$$

The simultaneous equations of (S8) and (S10) gives eqn (S11):

$$\theta = (1 - \theta) \frac{\sigma K_e (c_t - \alpha \theta)}{\{1 - K_e (c_t - \alpha \theta)\}^2} \tag{S11}$$

In this model simulation, the values of  $L$ ,  $S$ , and  $A_{\text{sub}}$  were experimentally determined (e.g.  $L = 1.0 \times 10^{-6}$  L,  $S = 3.1 \times 10^{-18}$  m<sup>2</sup>, and  $A_{\text{sub}} = 1.44 \times 10^{-4}$  m<sup>2</sup>), therefore  $\alpha$  was treated as a constant. When  $c_t$ ,  $K_e$ , and  $\sigma$  are given,  $\theta$  is derived from the eqn (S11). The dependence of fractional coverage  $\theta$  on the total concentration of **10** was experimentally observed by STM measurements. To obtain a curve of best fit for the experimental plot,  $K_e$  and  $\sigma$  were optimized by a non-linear regression analysis implemented in MATLAB® software (R2013a, version 8.1.0.604, win64) so that the residual error between experimental values of  $\theta$  over  $c_t$  and the simulated values is minimized. In the concentration region at which  $K_e [A^{\text{sol}}] \geq 1$ , a complete coverage was assumed in the model simulation.



## Supporting Data

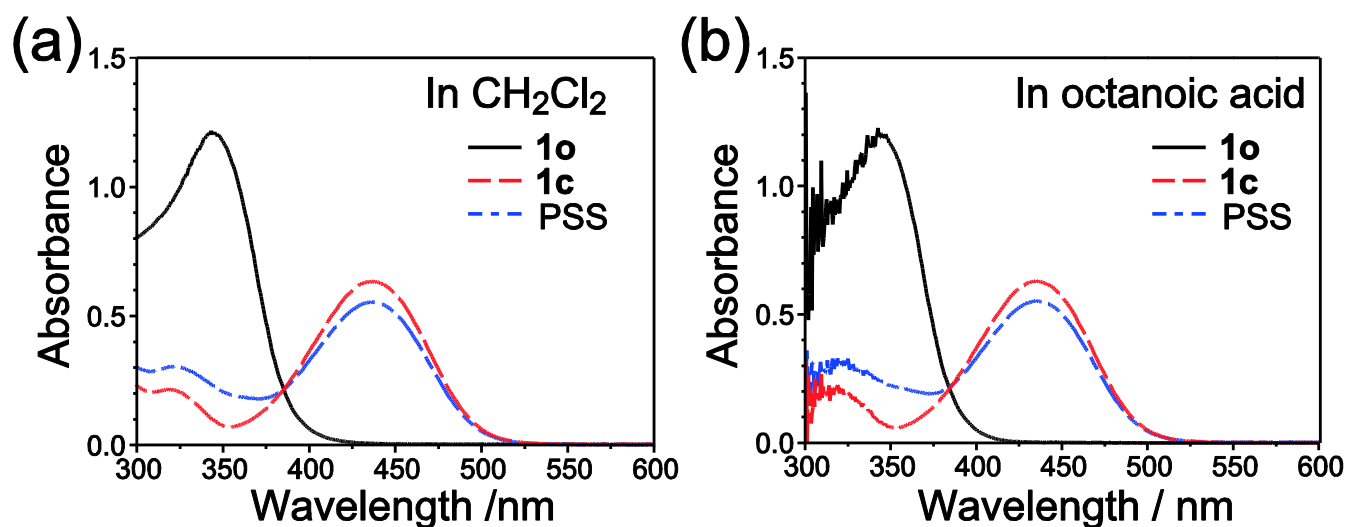

**Fig. S1** UV-vis spectral change of **1** (a) in CH<sub>2</sub>Cl<sub>2</sub> and (b) in octanoic acid upon photoisomerization ( $c = 1 \times 10^{-4}$  M). Black solid line denotes the open-ring isomer, red dashed line denotes the closed-ring isomer, and blue dotted line denotes the sample at the photostationary state (PSS) upon UV (365 nm) irradiation. Upon UV irradiation at 365 nm to a solution of **1o** in CH<sub>2</sub>Cl<sub>2</sub>, new absorption band appeared at  $\sim 436$  nm with an isobestic point. Successive visible light irradiation ( $\lambda > 450$  nm) regenerated the original spectrum of the open-ring isomer. The conversion ratio of the open- to the closed-ring isomer of **1** was 12:88 both in CH<sub>2</sub>Cl<sub>2</sub> and octanoic acid at the photostationary state (PSS) under the UV irradiation at 365 nm.

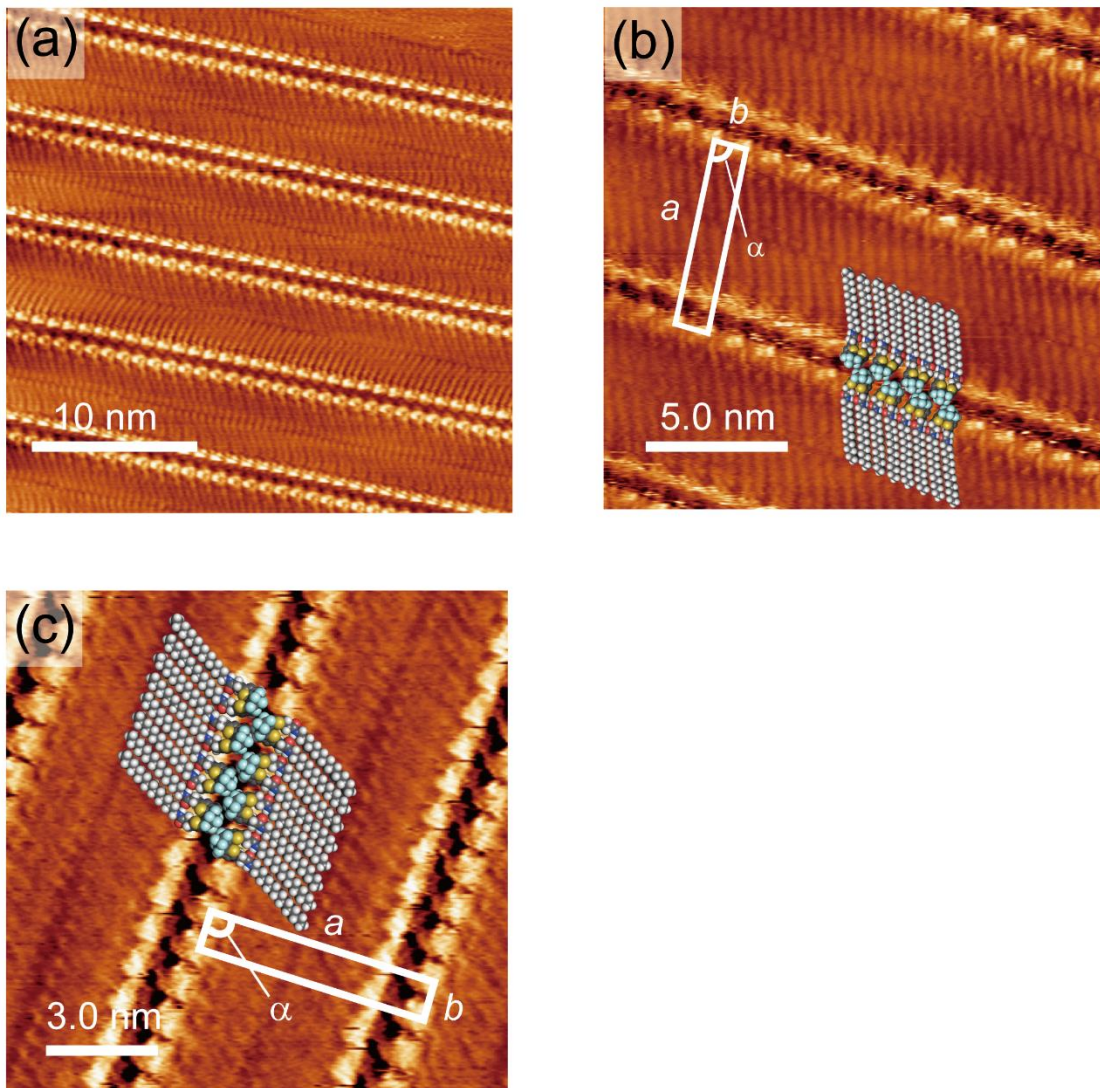

**Fig. S2** Another STM images of **1o** at the octanoic acid/HOPG interface in different scales ( $I_{\text{set}} = 30$  pA,  $V_{\text{bias}} = 800$  mV,  $a = 6.3$  nm,  $b = 1.0$  nm,  $\alpha = 89^\circ$ ). Two alkyl chains of a diarylethene **1o** can be clearly seen in these STM images.

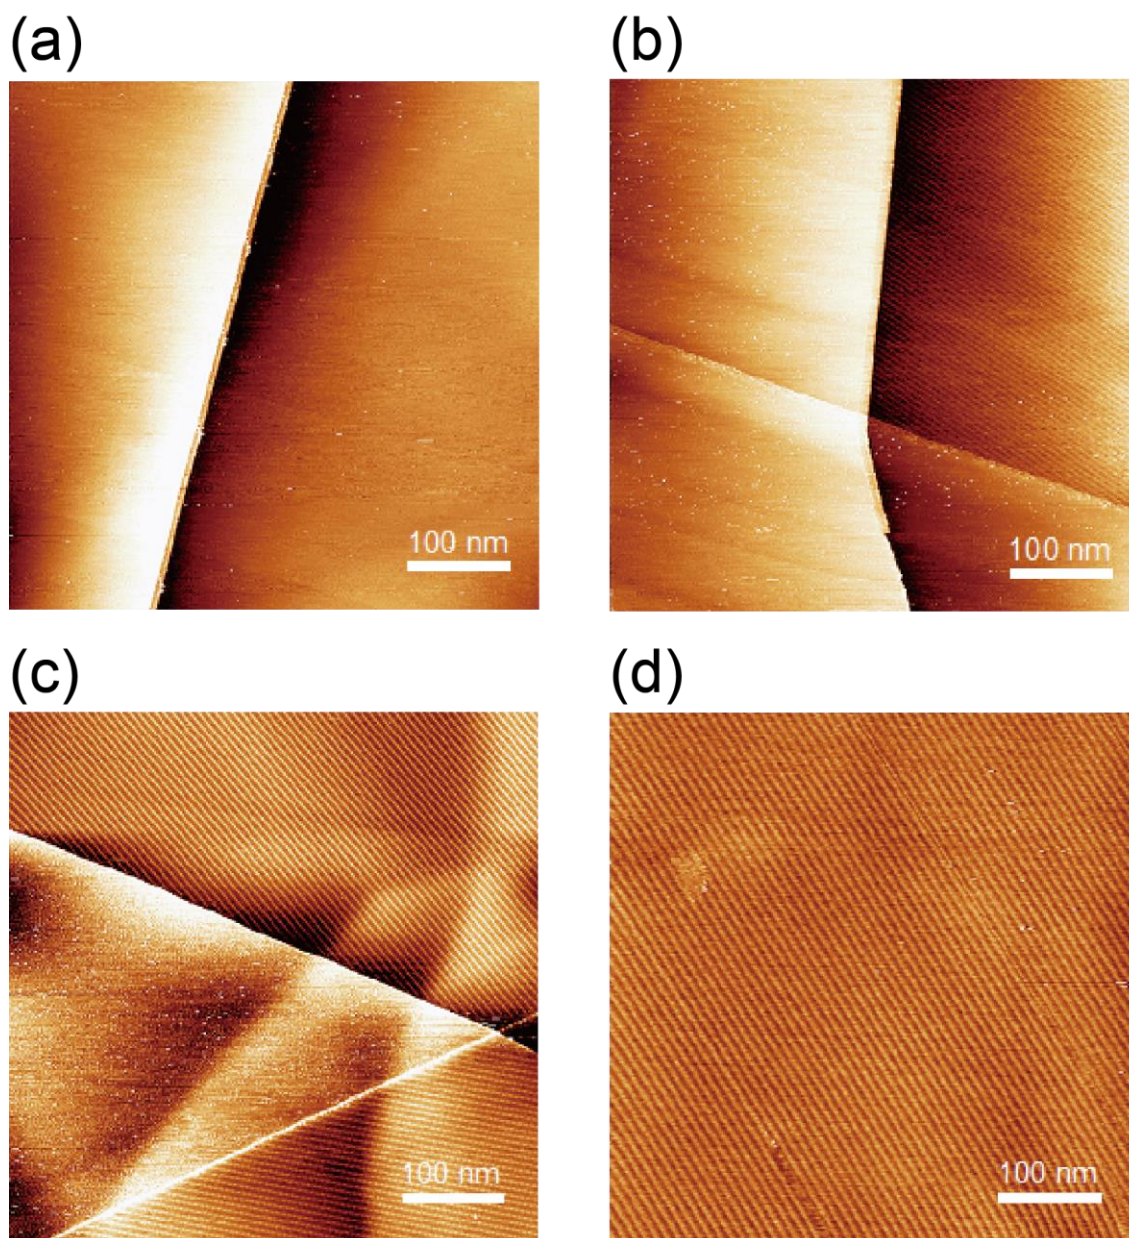

**Fig. S3** Concentration dependent STM images of **1o** at octanoic acid/HOPG interface. The concentration of **1o** solution were (a) 200  $\mu\text{M}$ , (b) 210  $\mu\text{M}$ , (c) 220  $\mu\text{M}$  and (d) 240  $\mu\text{M}$ , respectively.

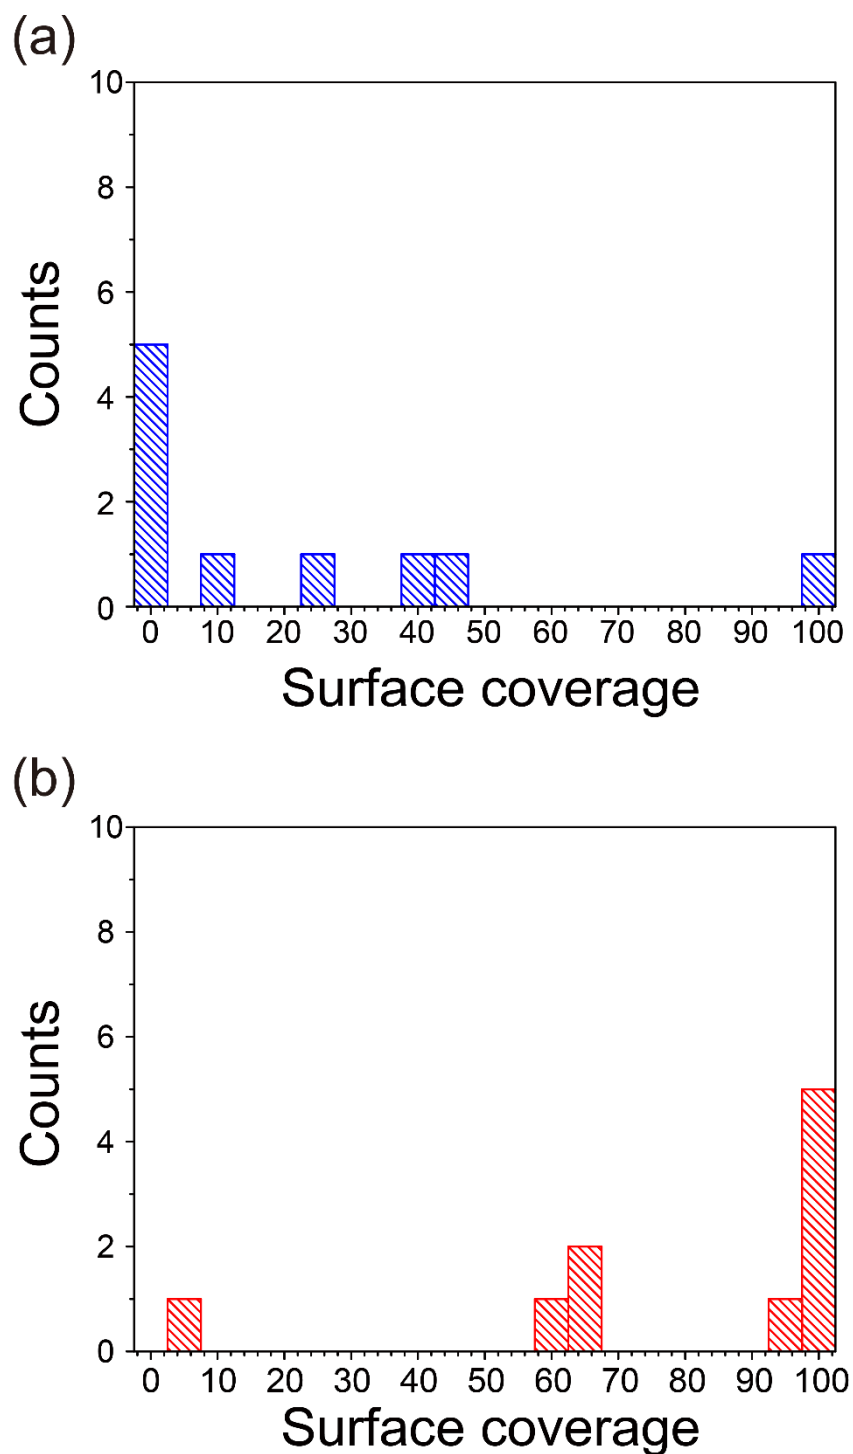

**Fig. S4** Histograms of surface coverage of **1o** on HOPG surface around the critical concentration ( $\sim 200 \mu\text{M}$ ) at (a)  $210 \mu\text{M}$  and (b)  $220 \mu\text{M}$ . The total area of STM image was  $1.0 \times 10^7 \text{ nm}^2$  in the region of concentration at which the change of surface coverage is prominent (i.e. from  $210$  to  $230 \mu\text{M}$ ).

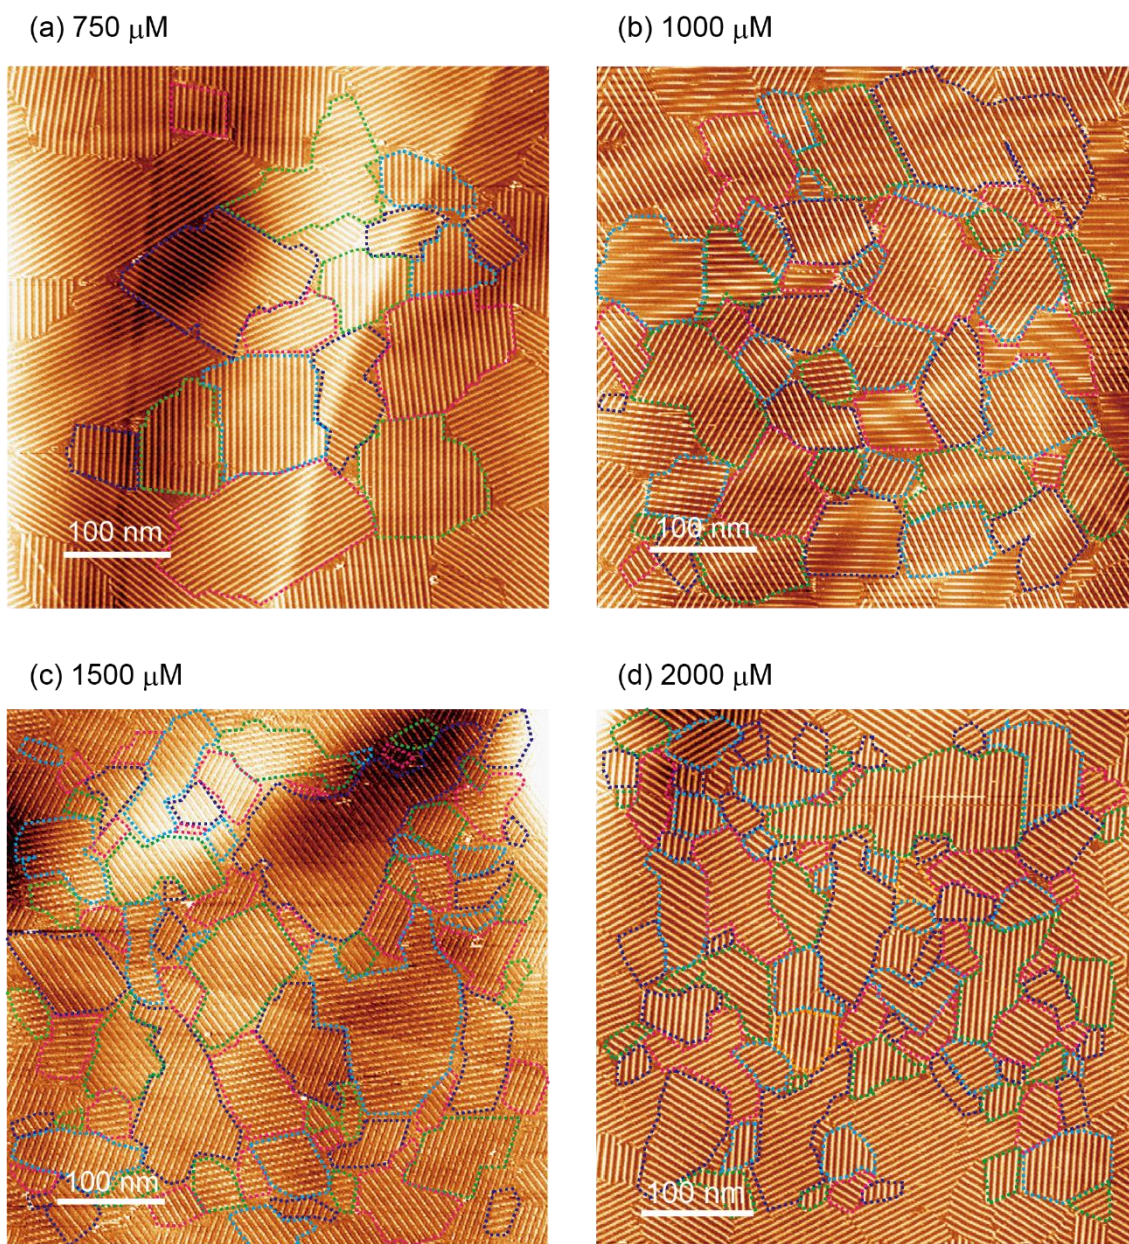

**Fig. S5** STM images of **1o** at octanoic acid/HOPG interface at high concentrations ( $> 750 \mu\text{M}$ ). The concentration of **1o** were (a) 750  $\mu\text{M}$ , (b) 1000  $\mu\text{M}$ , (c) 1500  $\mu\text{M}$  and (d) 2000  $\mu\text{M}$ . The domains marked by colored dotted lines were counted on a histogram. The other domains contacting with edge of images were eliminated due to unclear domain size.

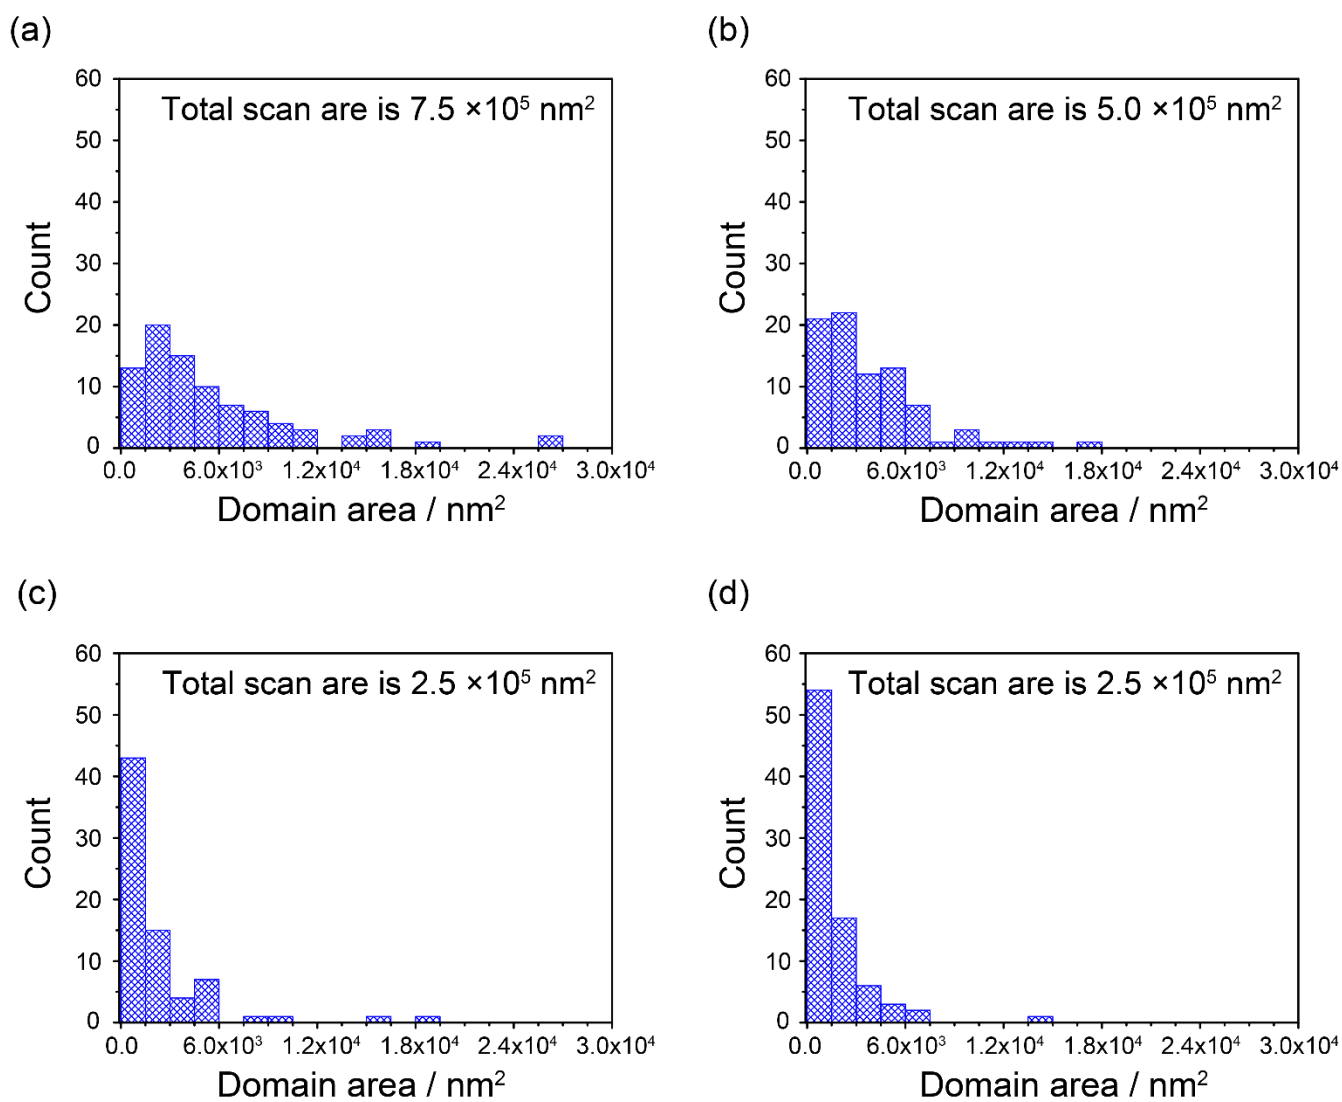

**Fig. S6** Histograms of domain areas of **1o** on HOPG surface at high concentrations ( $> 750 \mu\text{M}$ ). Concentrations of **1o** were (a)  $750 \mu\text{M}$ , (b)  $1000 \mu\text{M}$ , (c)  $1500$  and (d)  $2000 \mu\text{M}$ . The total area of STM image was shown in the graph.

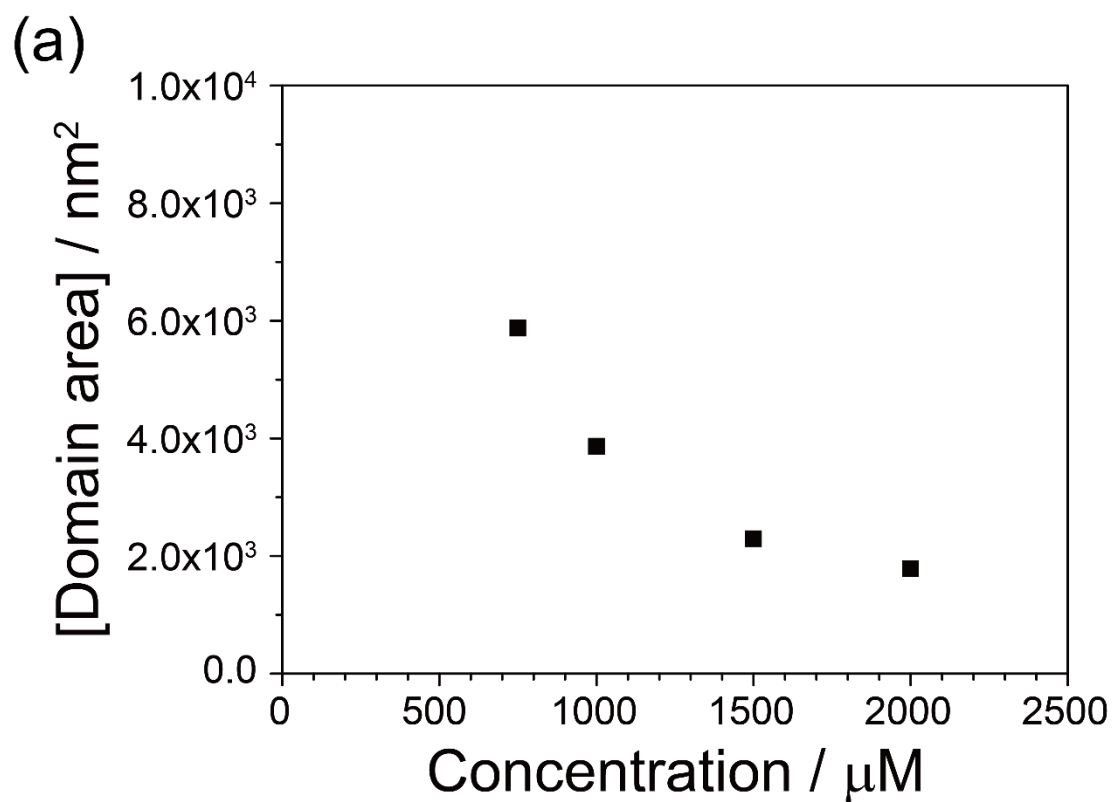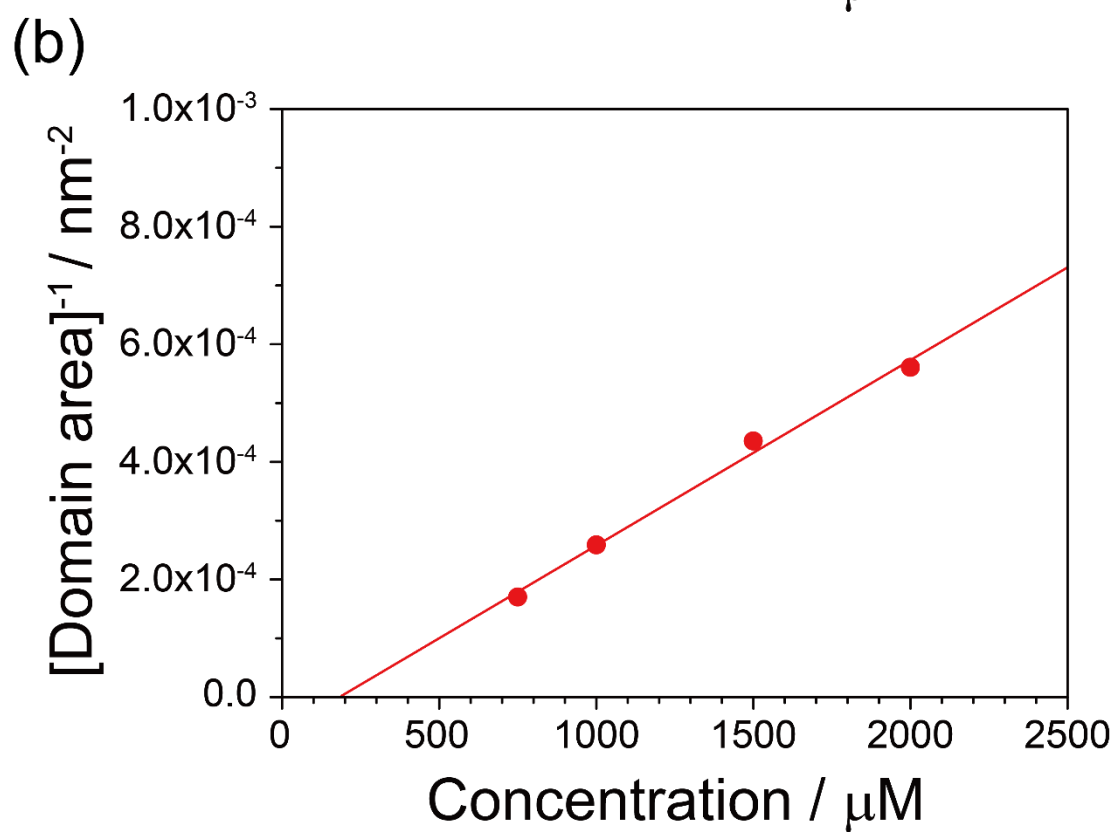

**Fig. S7** (a) The plot of average of domain area over sample concentration of **1o** at octanoic acid/HOPG interface. (b) The reciprocal of (a) over sample concentration of **1o**.

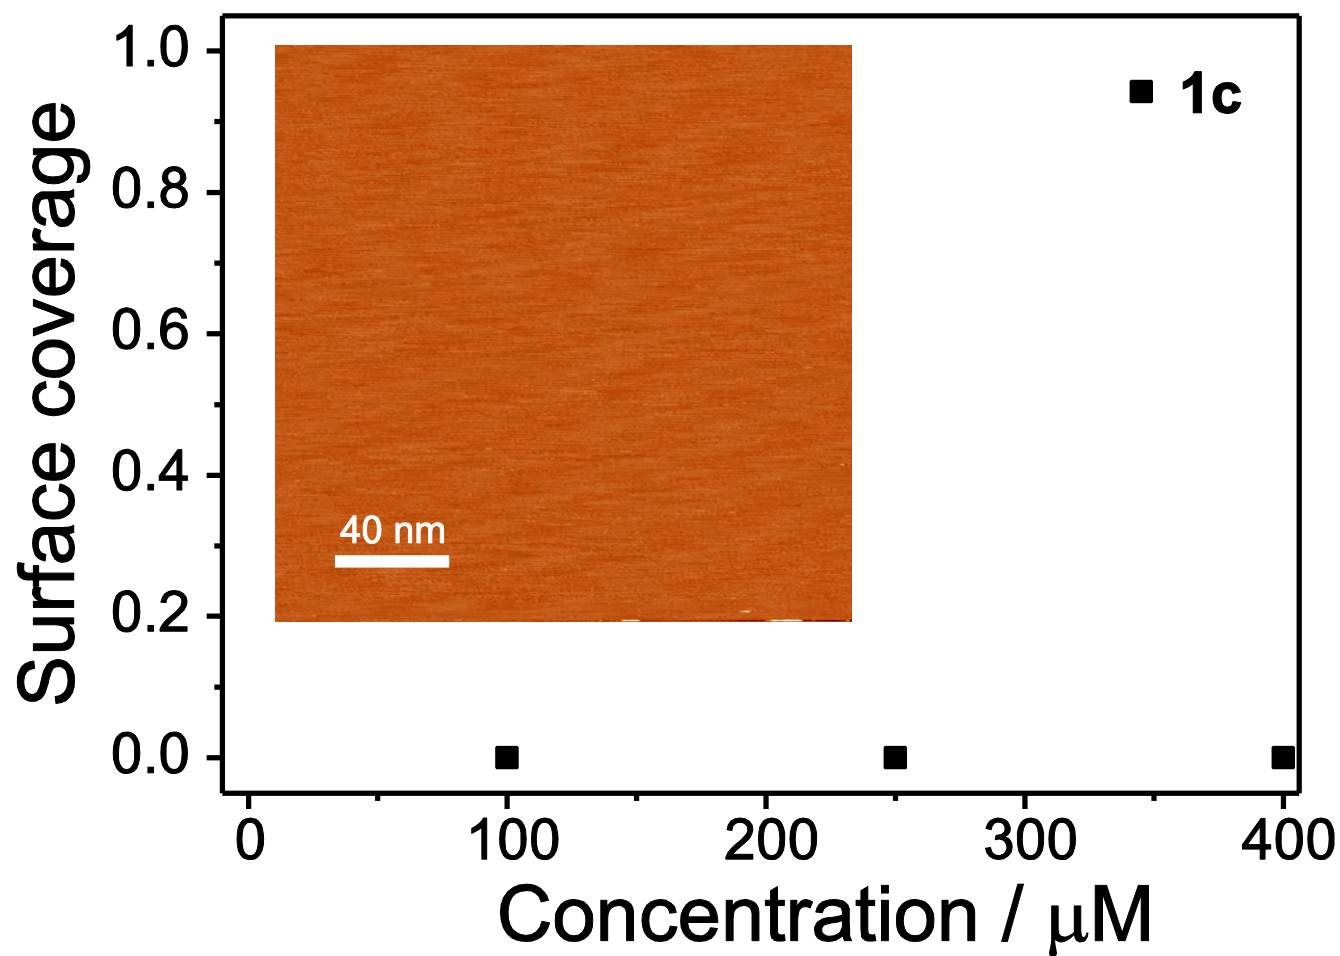

**Fig. S8** Concentration dependence of the fractional coverage of **1c** at the octanoic acid/HOPG interface. No ordering of **1c** was observed at various concentrations ranging from 100 to 1000  $\mu\text{M}$ . The inset shows a typical STM image with the closed-ring isomer **1c**.



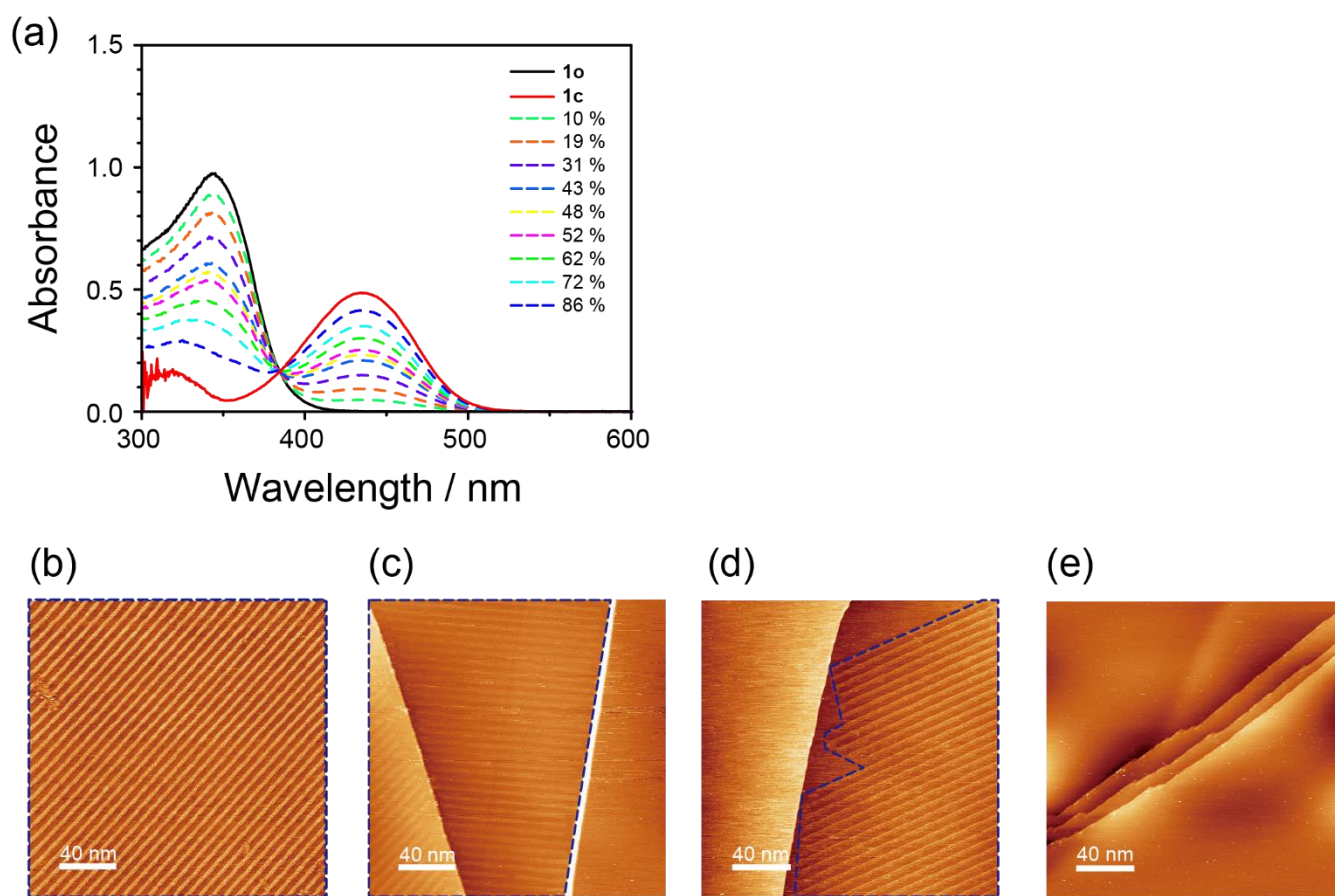

**Fig. S9** (a) UV-vis spectral change of **1o** in octanoic acid upon UV irradiation (365 nm). The conversion ratio of **1c** to **1o** for each spectra were shown in the legend. STM images of the sample with conversion ratio (b) 0, (c) 43, (d) 48, and (e) 62 %.

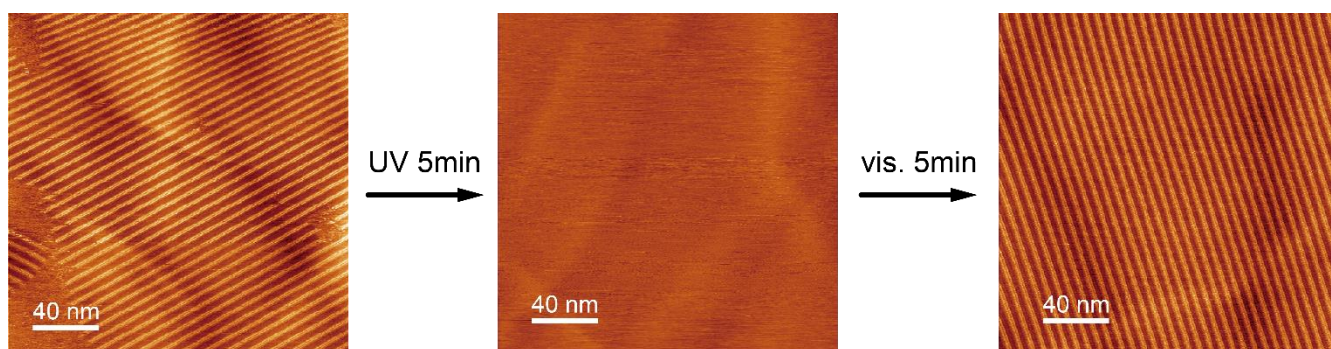

**Fig. S10** Reversible ordering formation/disappearance of **1** upon in situ photoirradiation at the octanoic acid/HOPG interface ( $c = 500 \mu\text{M}$ ,  $I_{\text{set}} = 30 \text{ pA}$ ,  $V_{\text{bias}} = 800 \text{ mV}$ ). In situ UV irradiation for 5 min at the liquid/HOPG interface of **1o** solution caused disappearance of the ordering. After the monolayer of **1o** disappeared, visible light irradiation for 5 min to the same sample caused formation of the same monolayer again. These molecular packing of the monolayer was identical before and after photoirradiation.

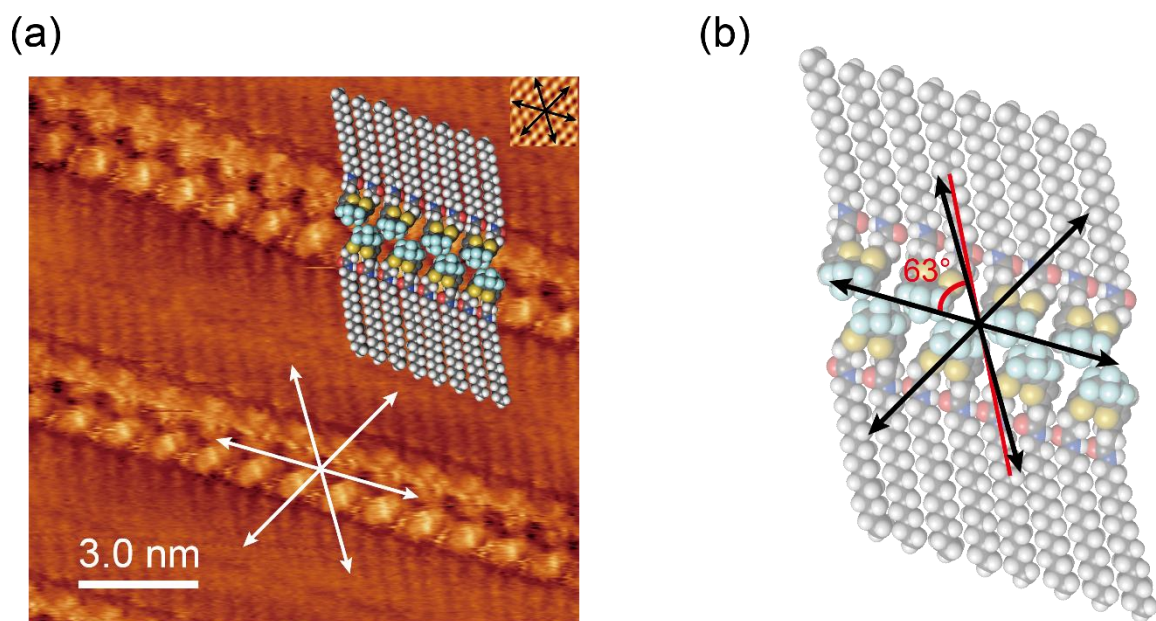

**Fig. S11** Molecular orientation in respect to the HOPG lattice. (a) STM image and the direction of HOPG lattice. (b) Molecular model and the direction of HOPG lattice. Arrow shows  $\langle 11\bar{2}0 \rangle$  direction of HOPG lattice. Red line shows the direction of alkyl group of diarylethene **1o**. The column of diarylethene and amide group was consistent with  $\langle 11\bar{2}0 \rangle$  direction of HOPG. In addition, the direction of alkyl group was tilted at only  $3^\circ$  in respect to  $\langle 11\bar{2}0 \rangle$  direction of HOPG, resulting in bright image of alkyl group.

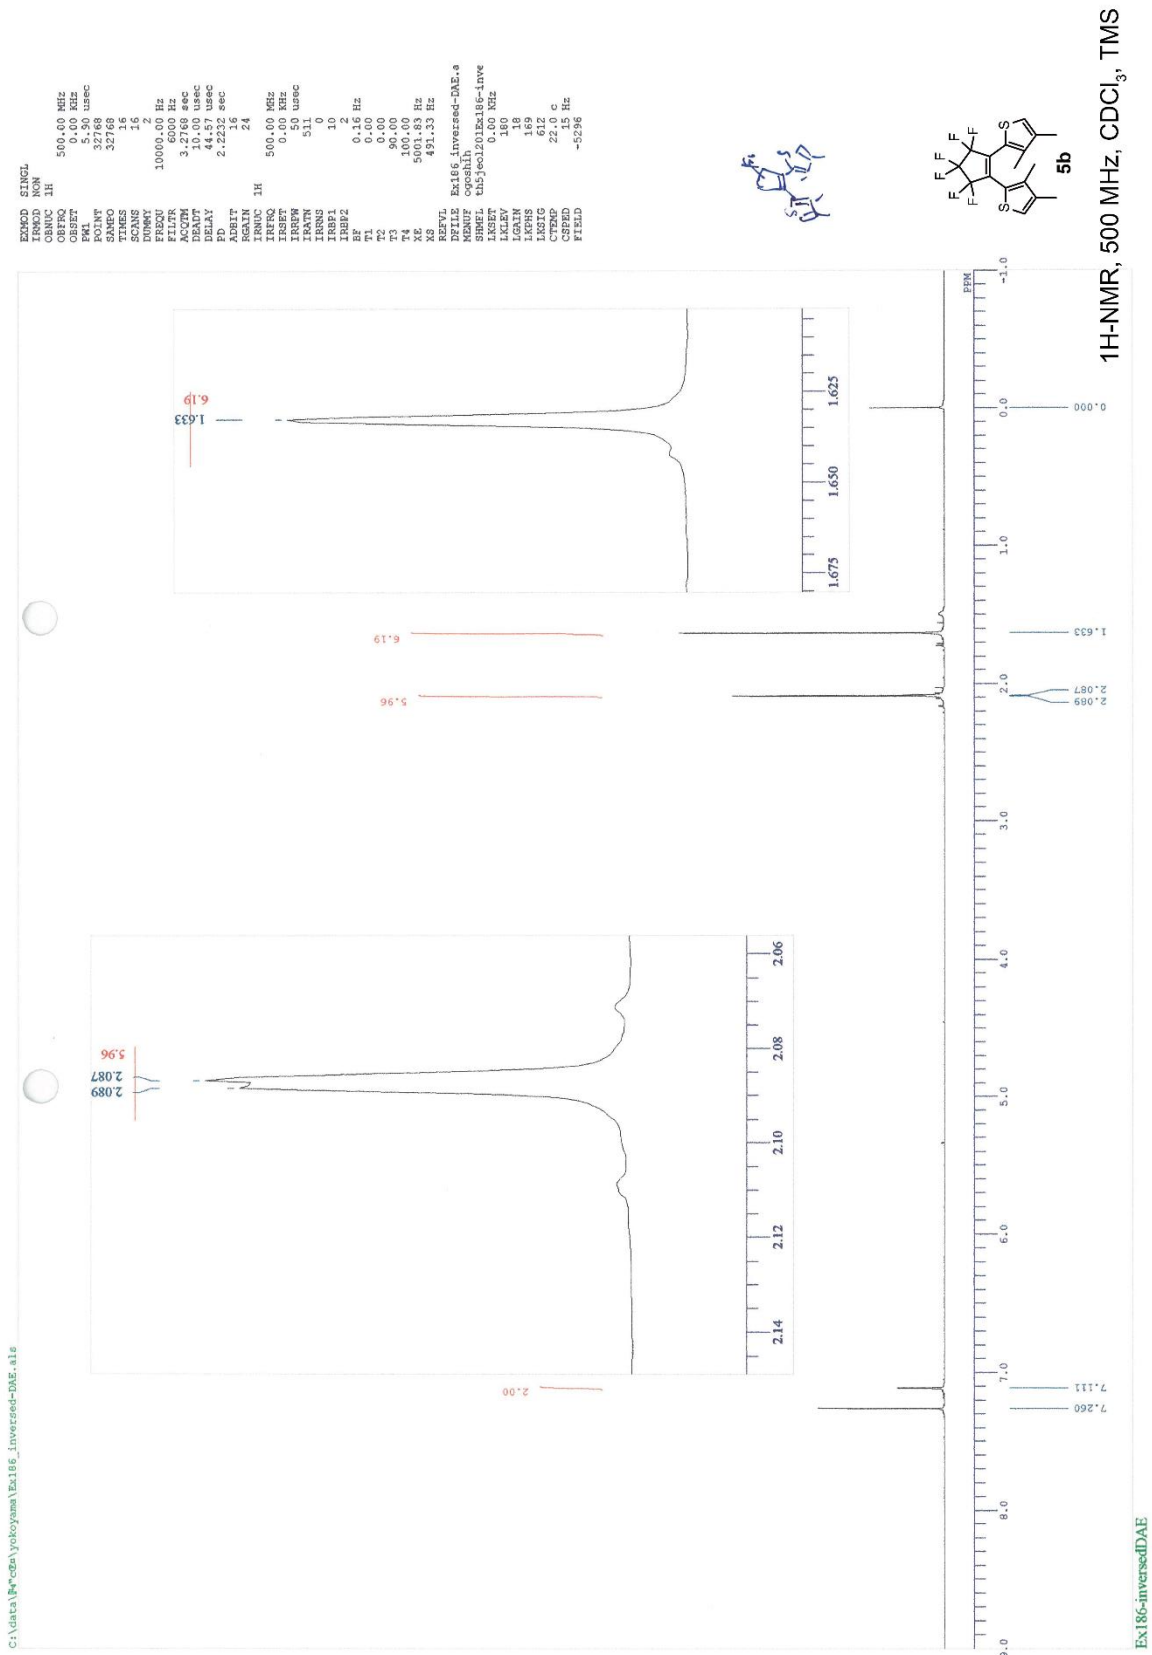

**Fig. S12** <sup>1</sup>H NMR spectra of compound **5b** (CDCl<sub>3</sub>, 500 MHz)

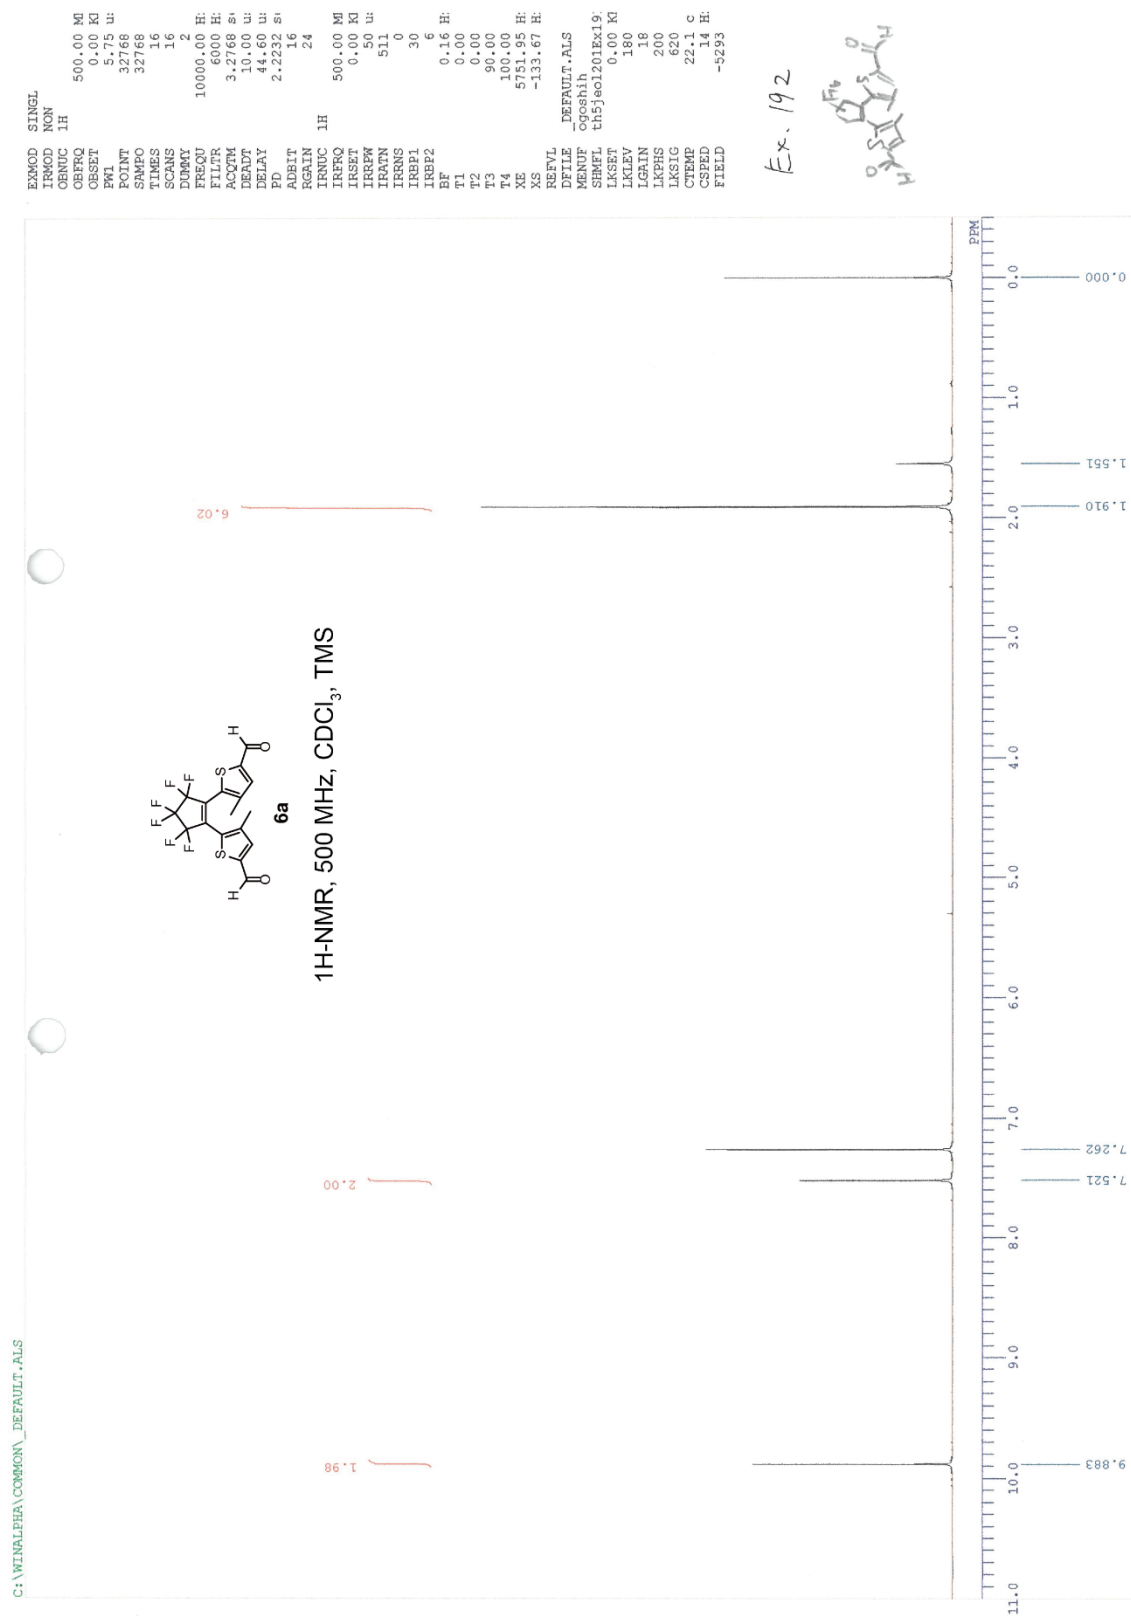

Fig. S13 <sup>1</sup>H NMR spectra of compound **6a** (CDCl<sub>3</sub>, 500 MHz)

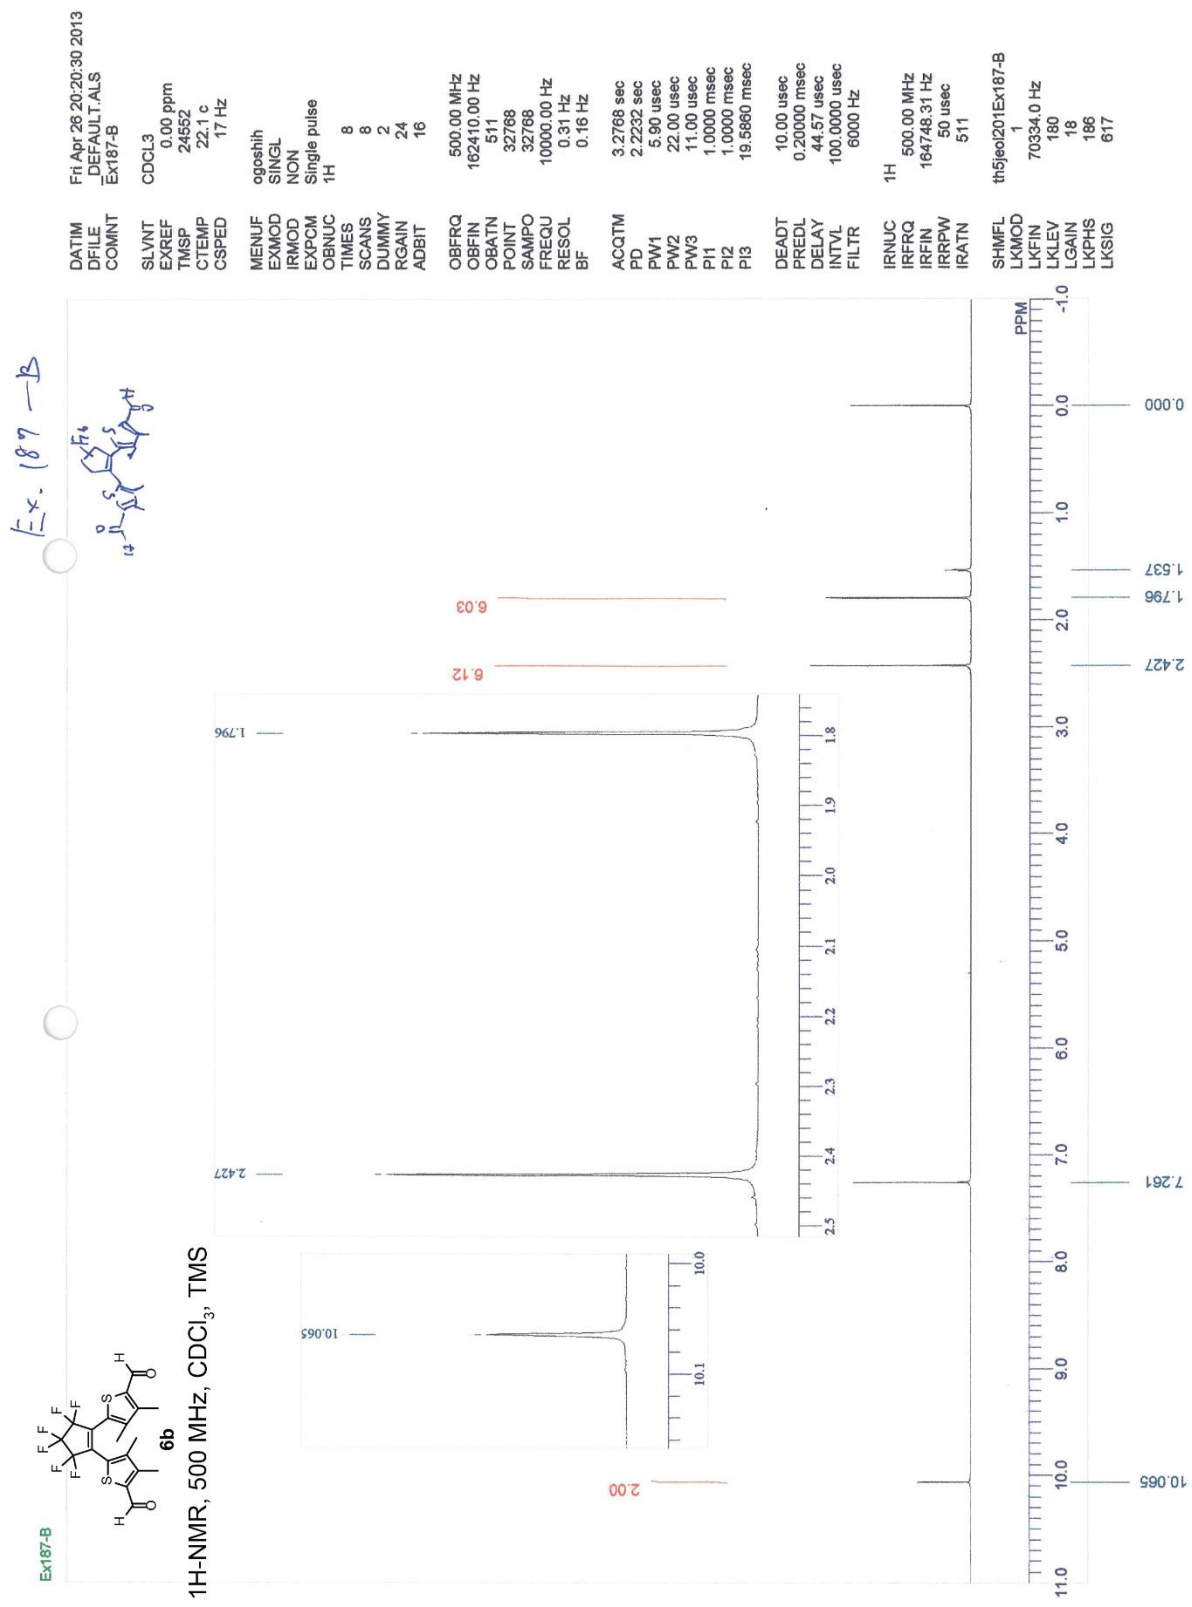

Fig. S14 <sup>1</sup>H NMR spectra of compound **6b** (CDCl<sub>3</sub>, 500 MHz)

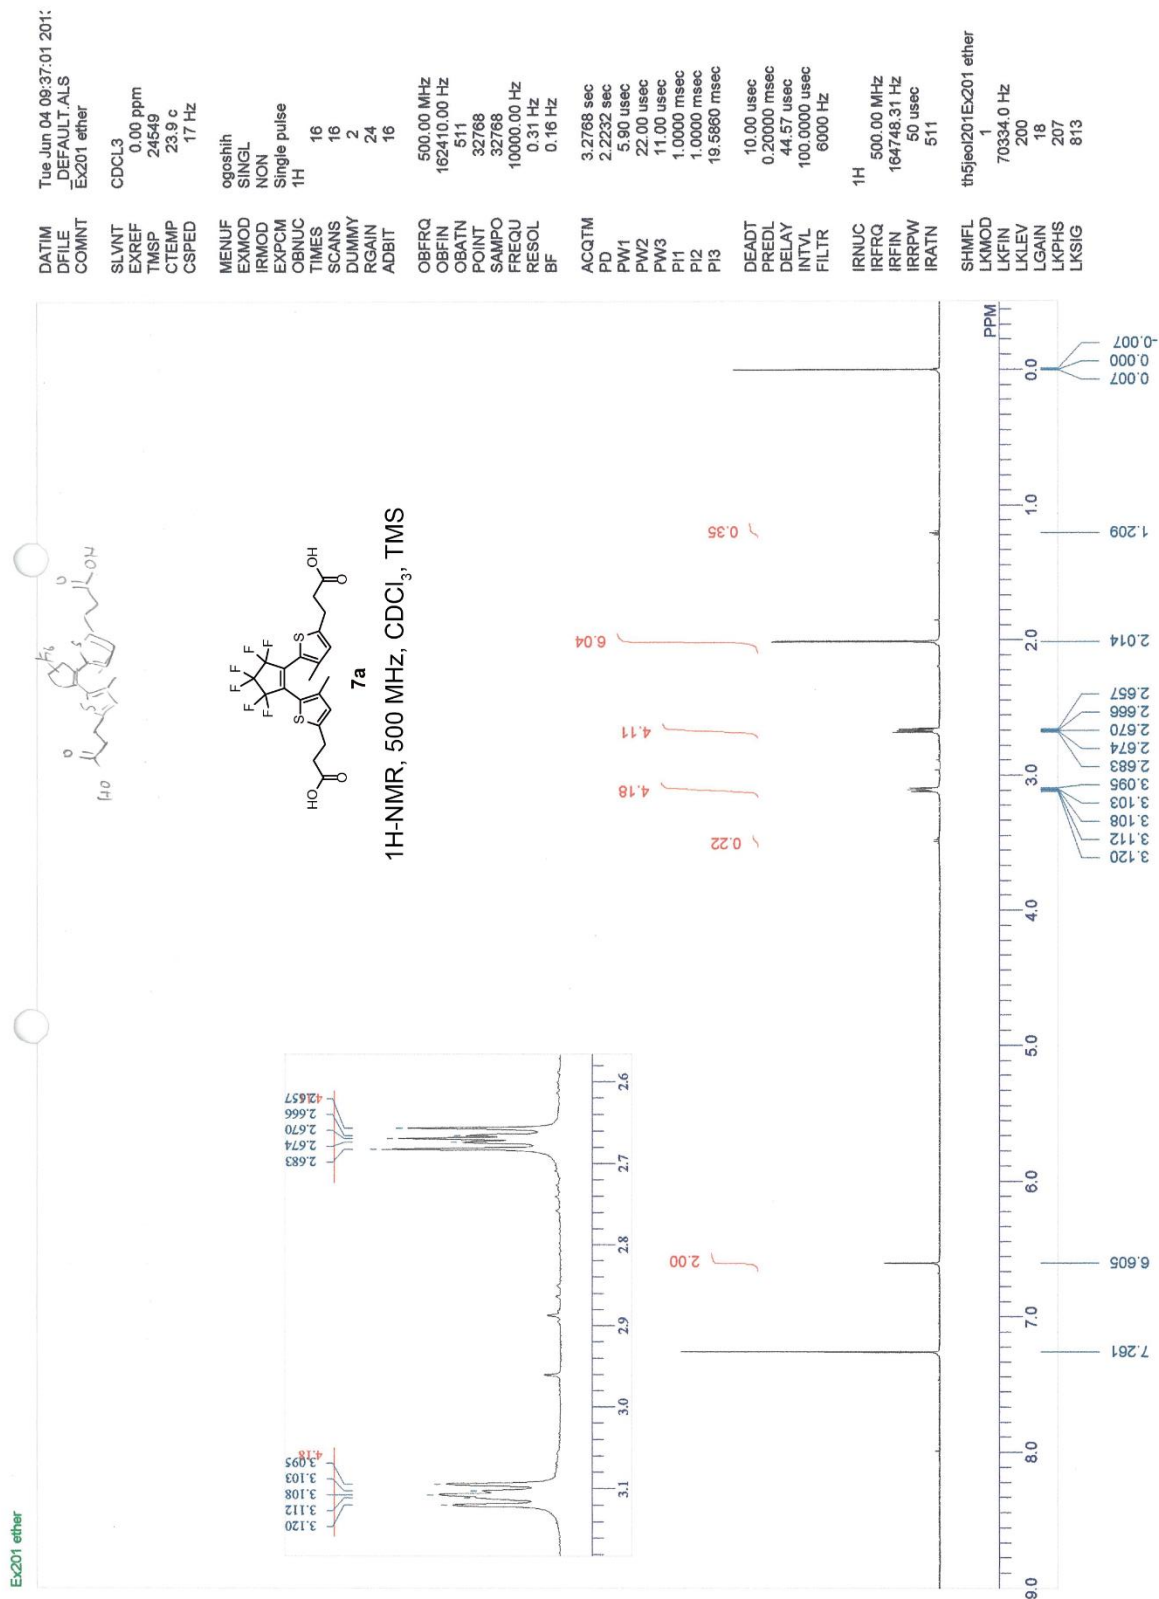

Fig. S15 <sup>1</sup>H NMR spectra of compound **7a** (CDCl<sub>3</sub>, 500 MHz)

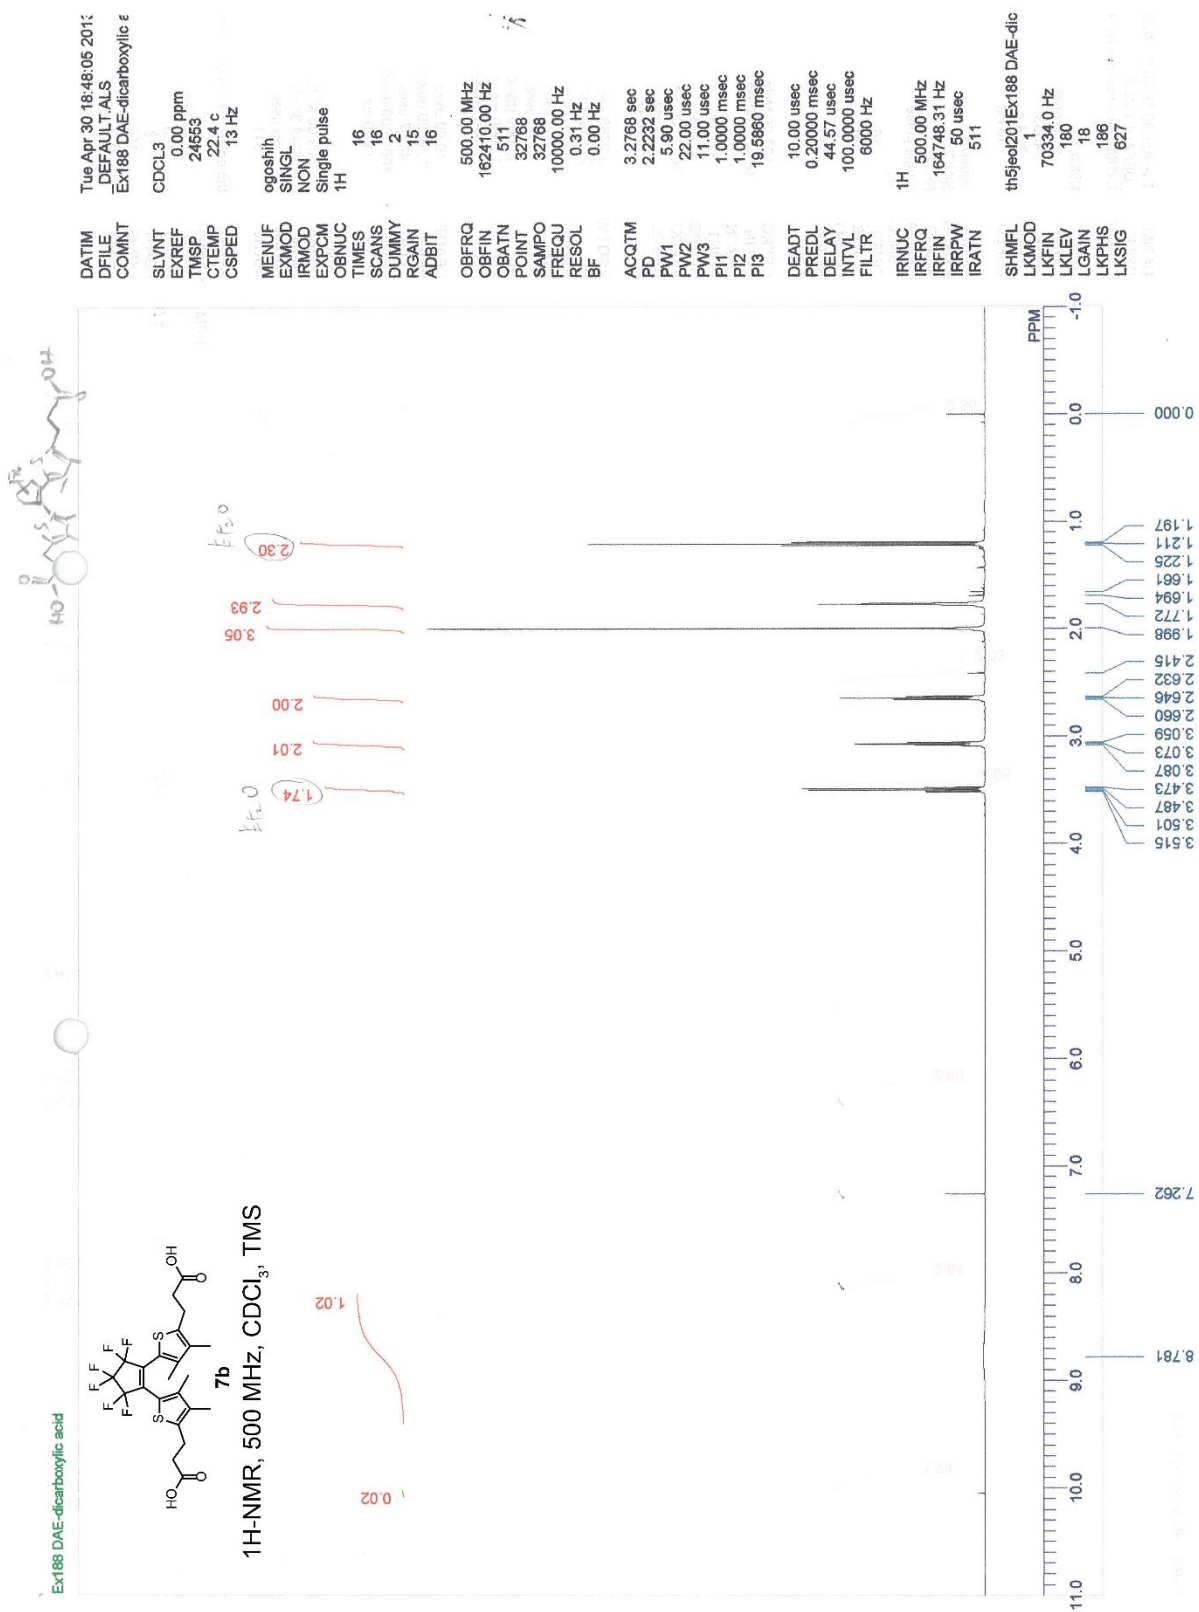

**Fig. S16** <sup>1</sup>H NMR spectra of compound **7b** (CDCl<sub>3</sub>, 500 MHz)



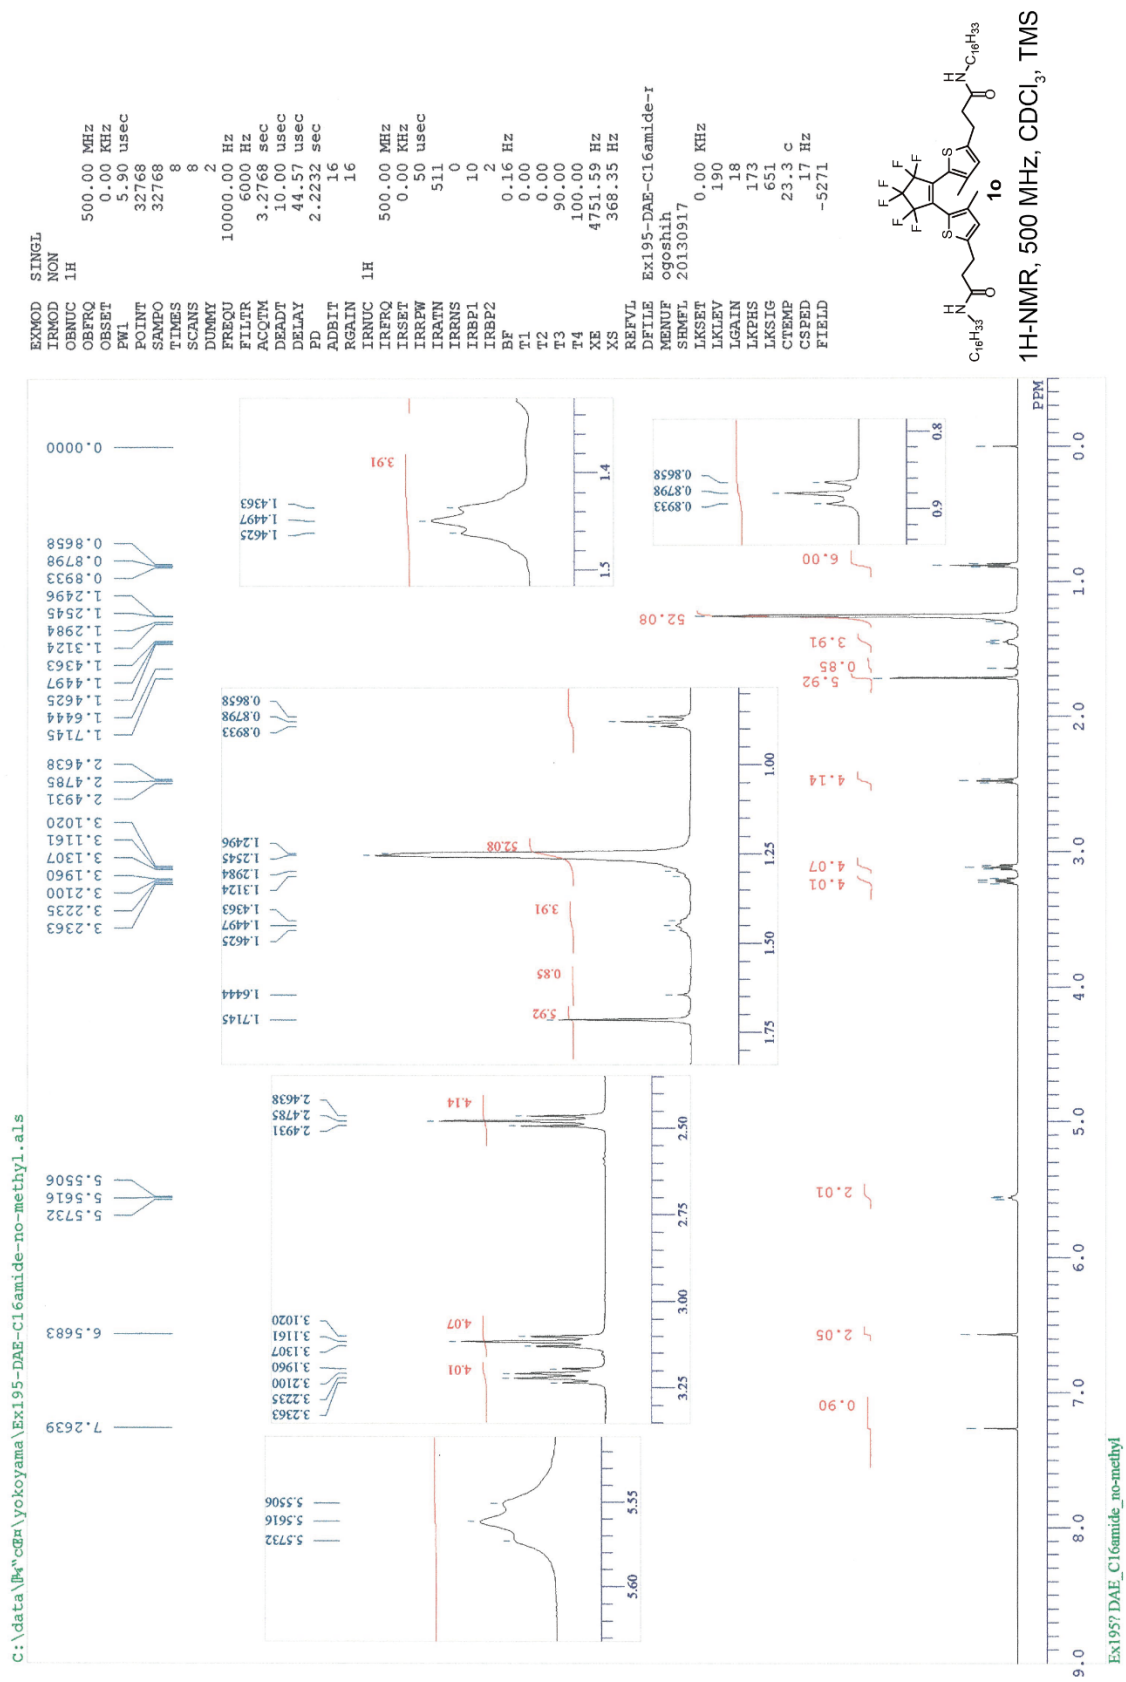

**Fig. S17** <sup>1</sup>H NMR spectra of compound **10** (CDCl<sub>3</sub>, 500 MHz)

DEFILE EX195DAEAMIDDEC16-13C-1H.aals  
 COMNT 2013-10-31 02:46:52  
 DATIM 13C  
 ORNLIC single pulse dec  
 EXMOD 150.97 MHz  
 ORFRO 8.52 KHz  
 ORSET 1.74 Hz  
 POINT 32768  
 SCANS 41666.67 Hz  
 FREQOU 15000  
 ACQTM 0.7864 sec  
 PD 1.6200 sec  
 PW1 3.77 usec  
 IRNUC 1H 24.0 c  
 CTEMP CDCl3  
 SLVNT 77.00 ppm  
 EXREF 0.63 Hz  
 BF 60  
 RGAIN

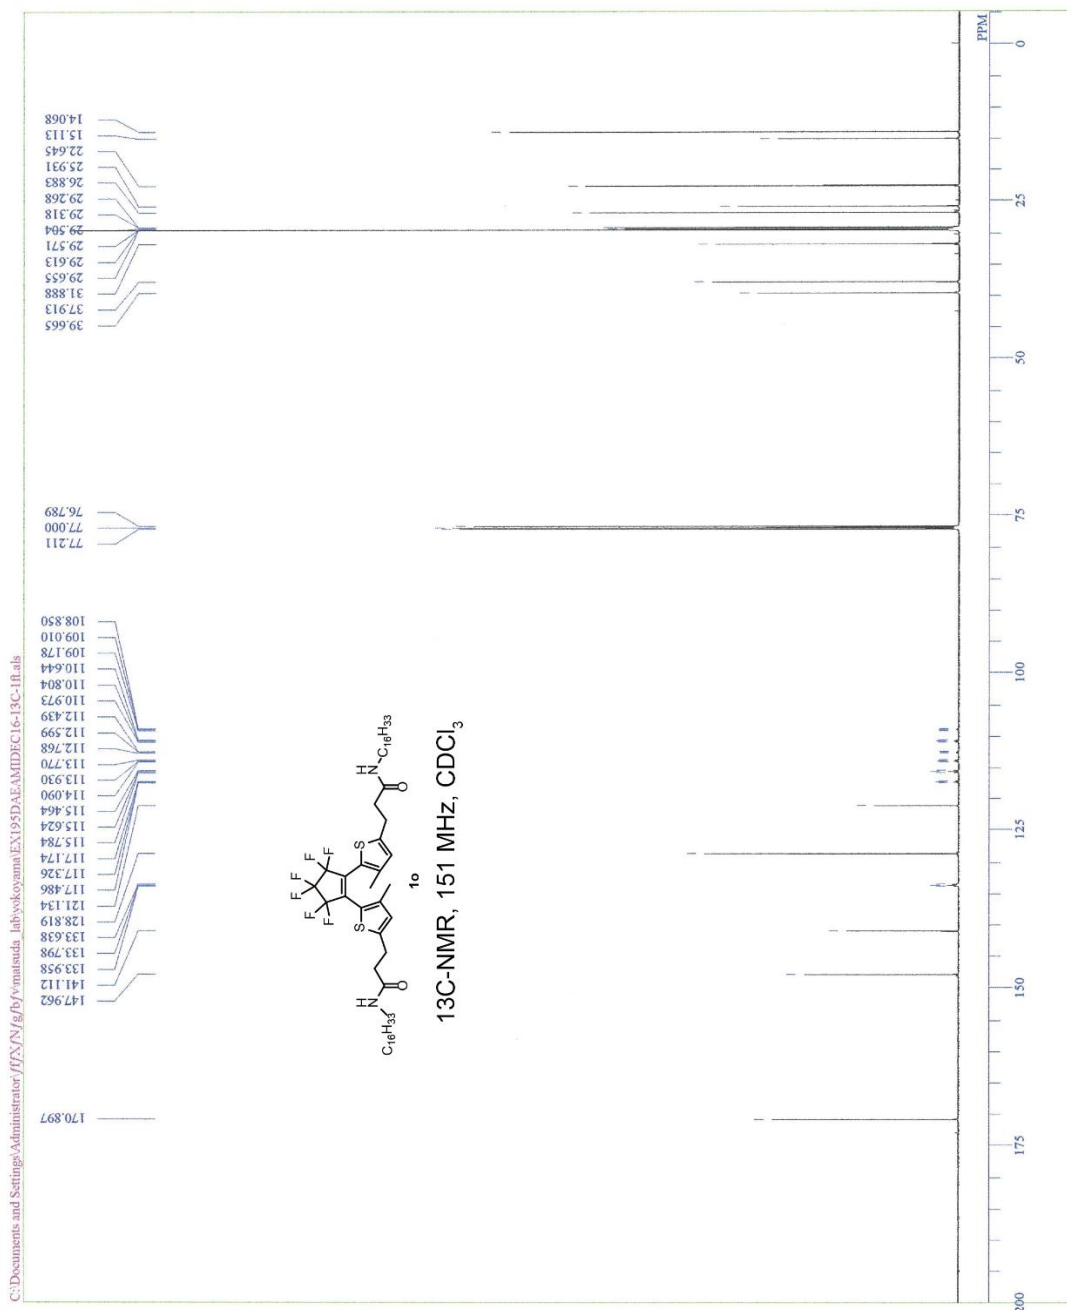

Fig. S18 <sup>13</sup>C NMR spectra of compound **1o** (CDCl<sub>3</sub>, 151 MHz)

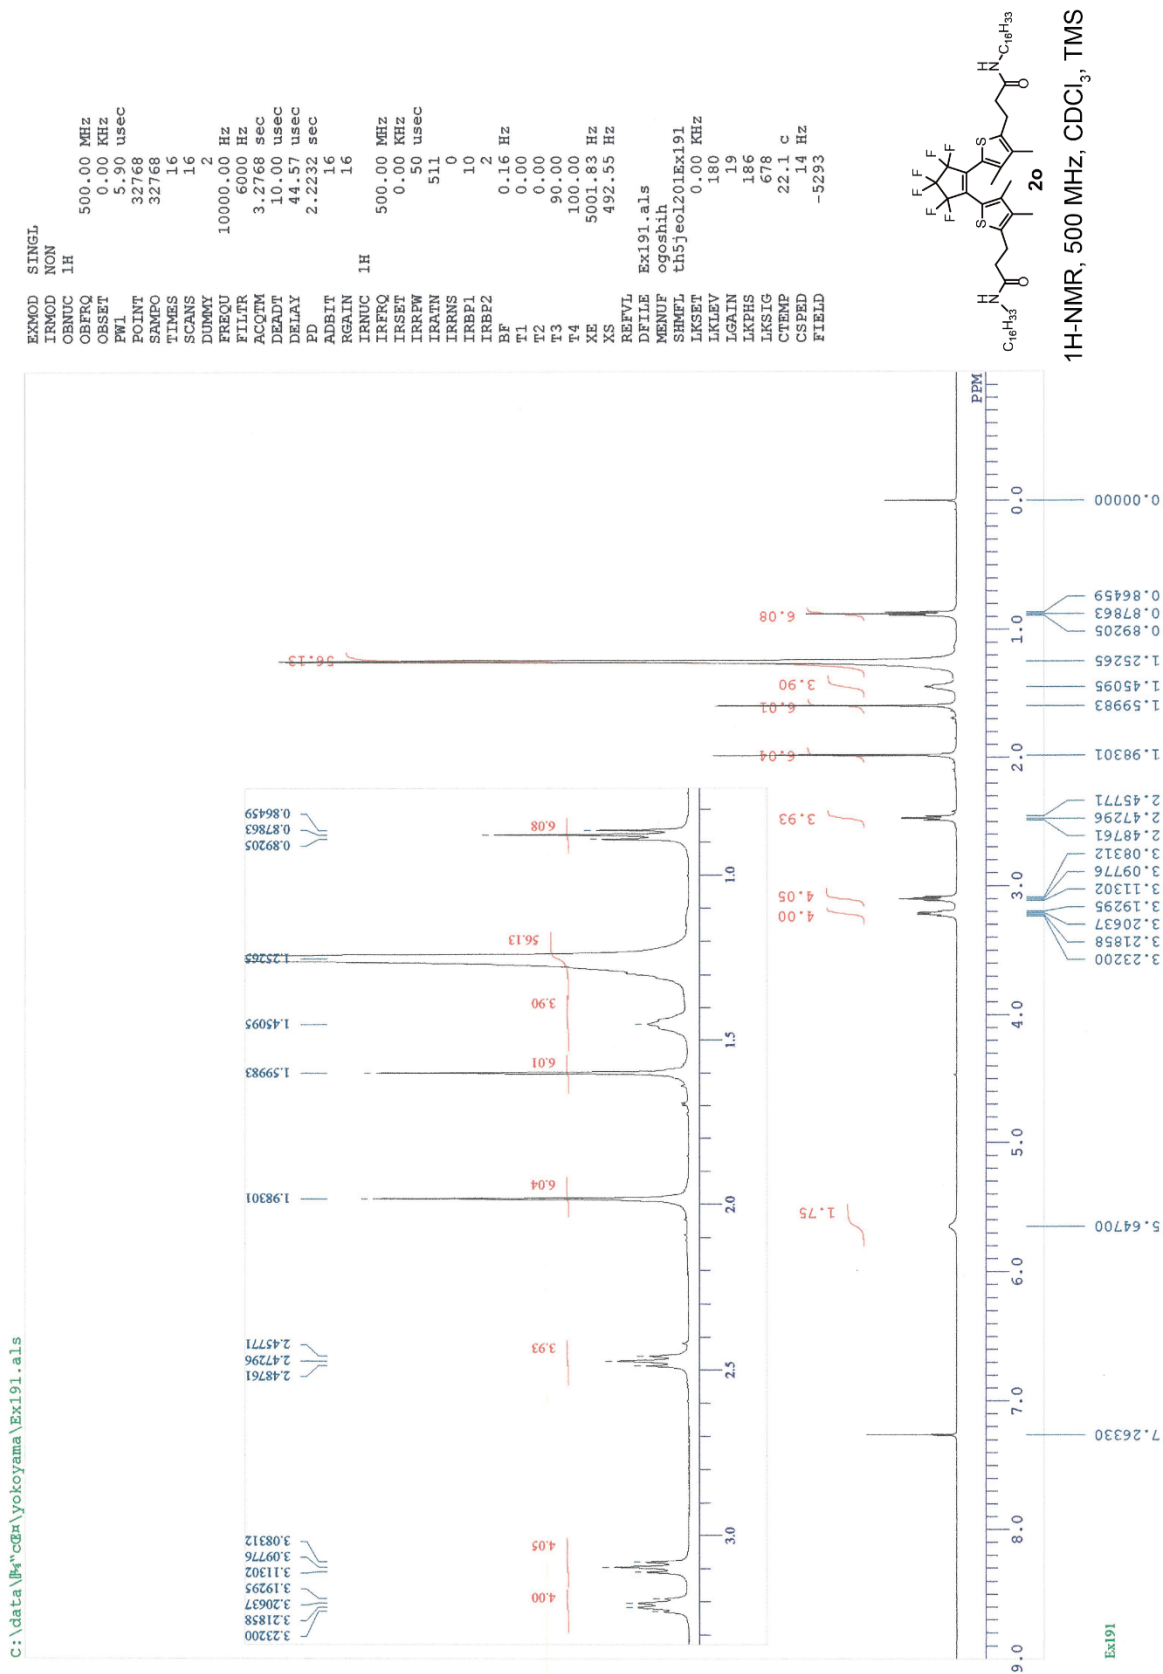

Fig. S19 <sup>1</sup>H NMR spectra of compound **2o** (CDCl<sub>3</sub>, 500 MHz)

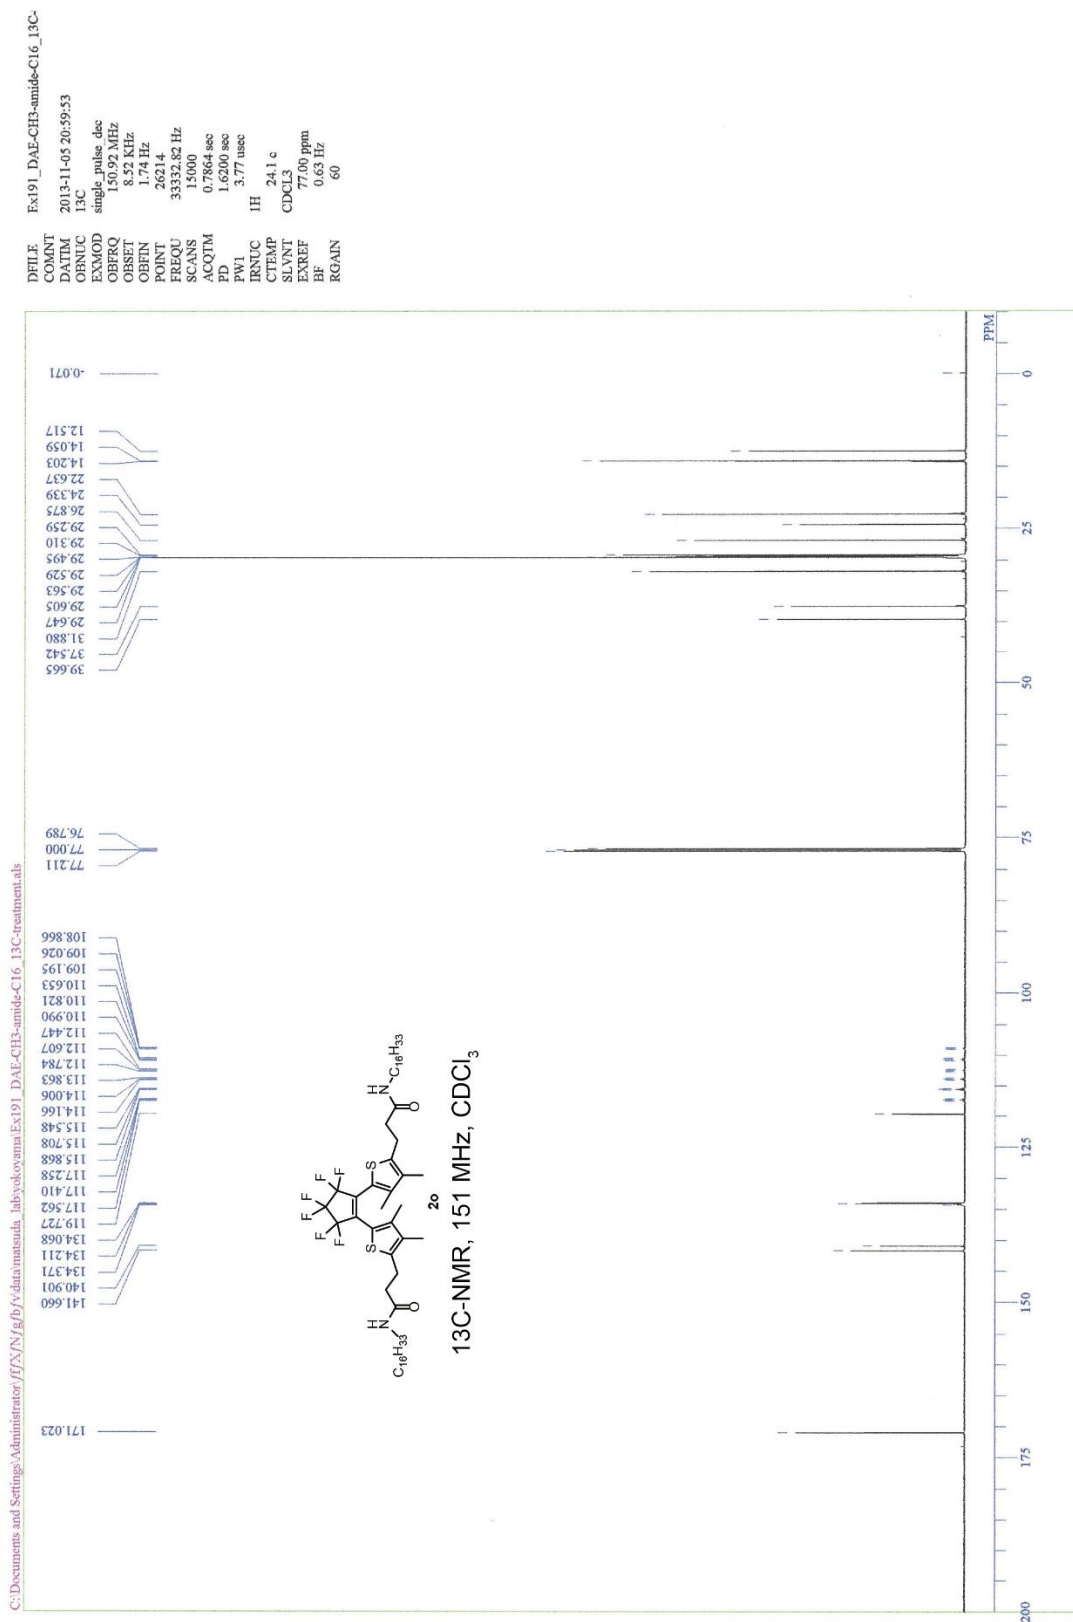

Fig. S20 <sup>13</sup>C NMR spectra of compound **2o** (CDCl<sub>3</sub>, 151 MHz)

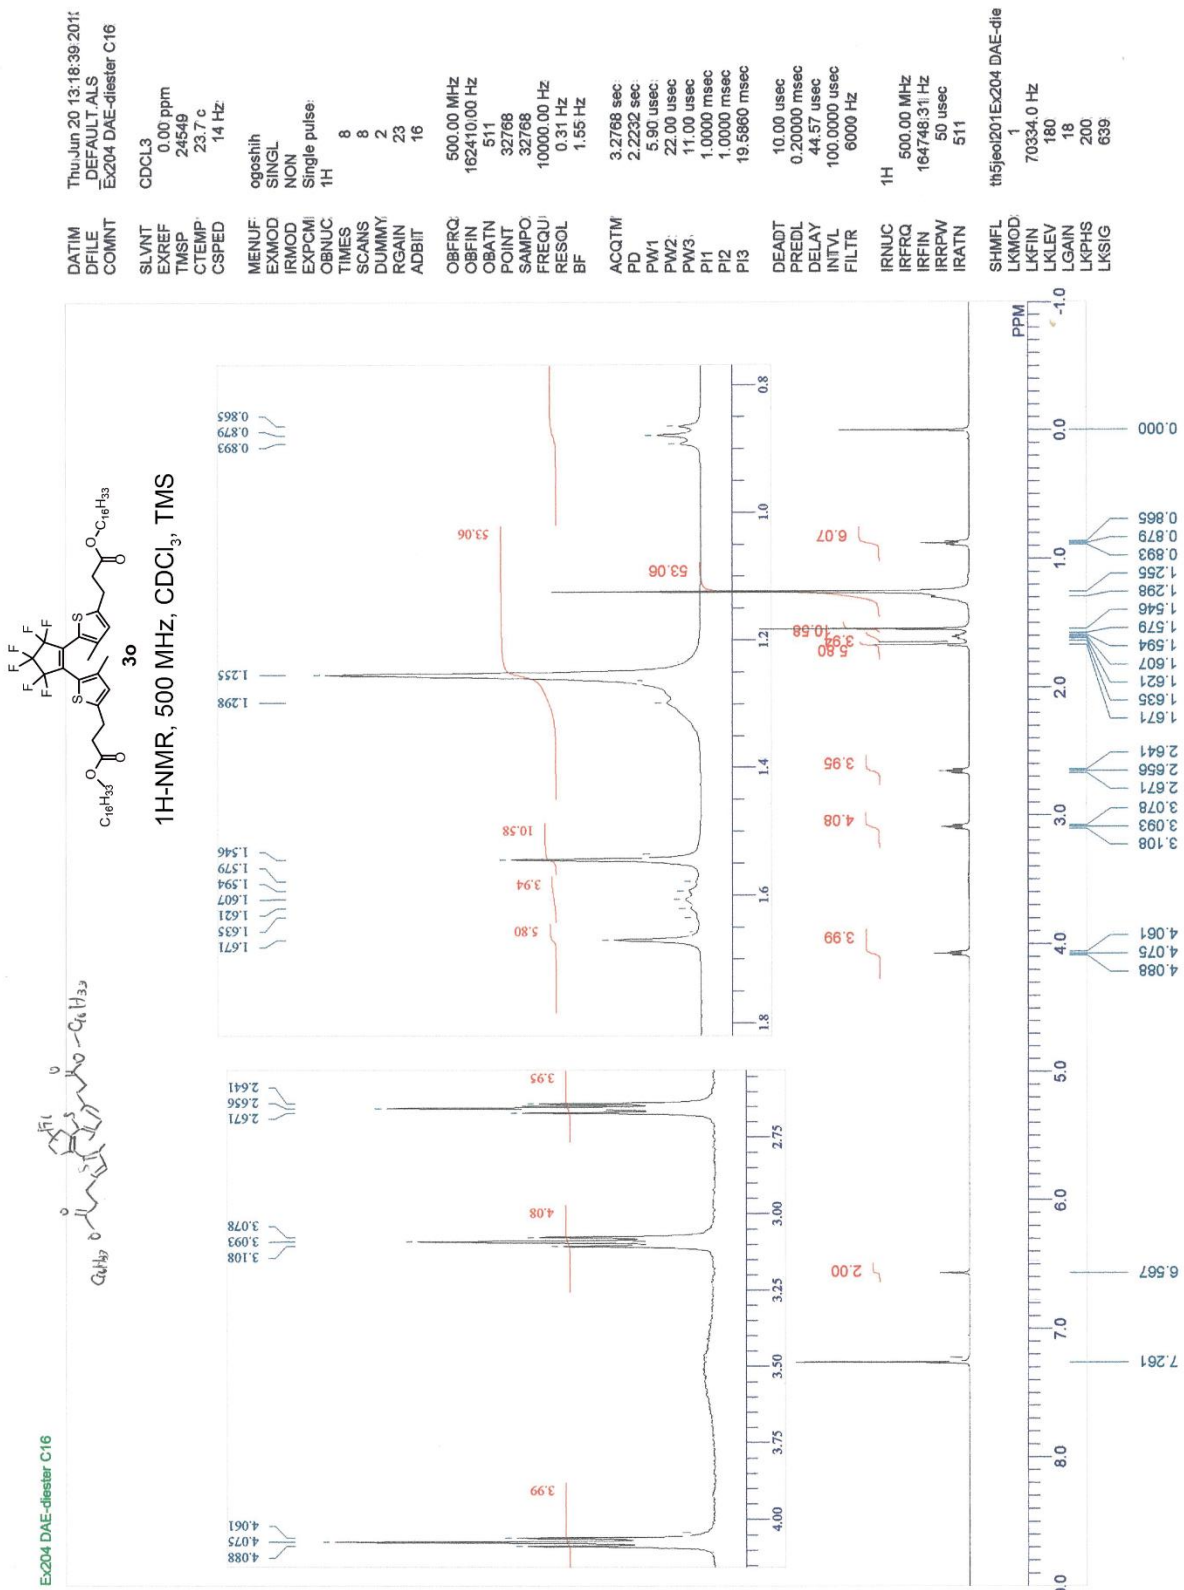

**Fig. S21** <sup>1</sup>H NMR spectra of compound **3o** (CDCl<sub>3</sub>, 500 MHz)

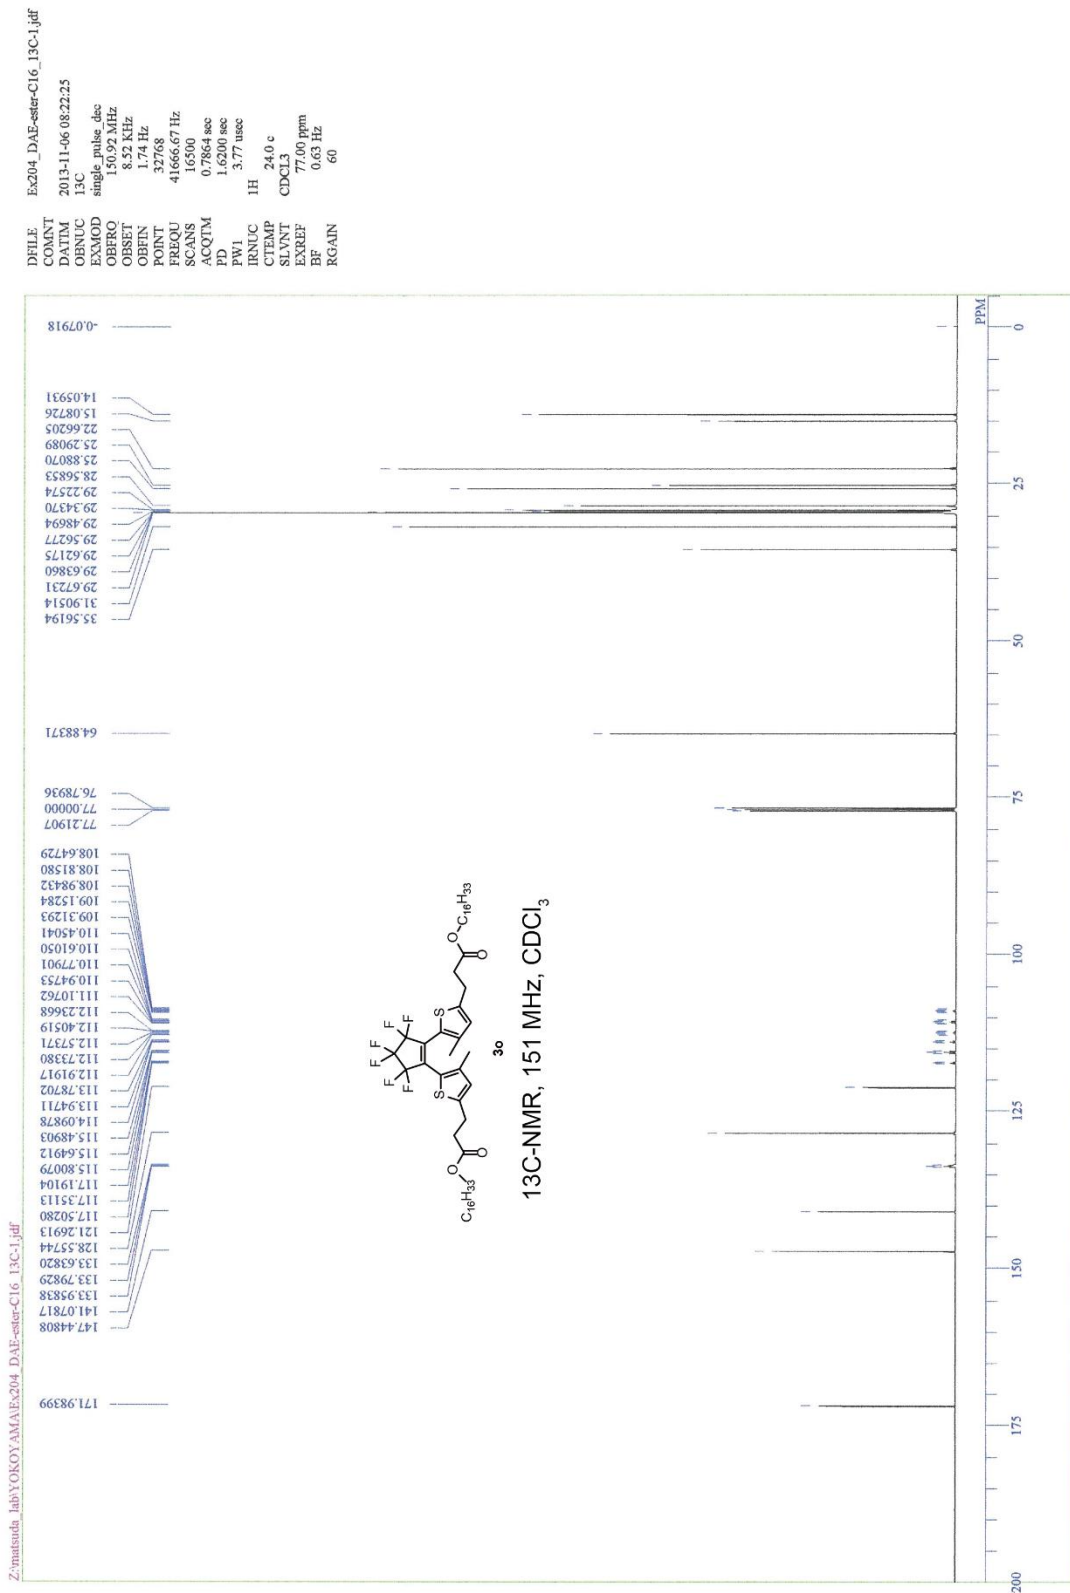

Fig. S22 <sup>13</sup>C NMR spectra of compound **3o** (CDCl<sub>3</sub>, 151 MHz)

C:\data\l\l\yokoyama\closedDAEamide\c16.a1s

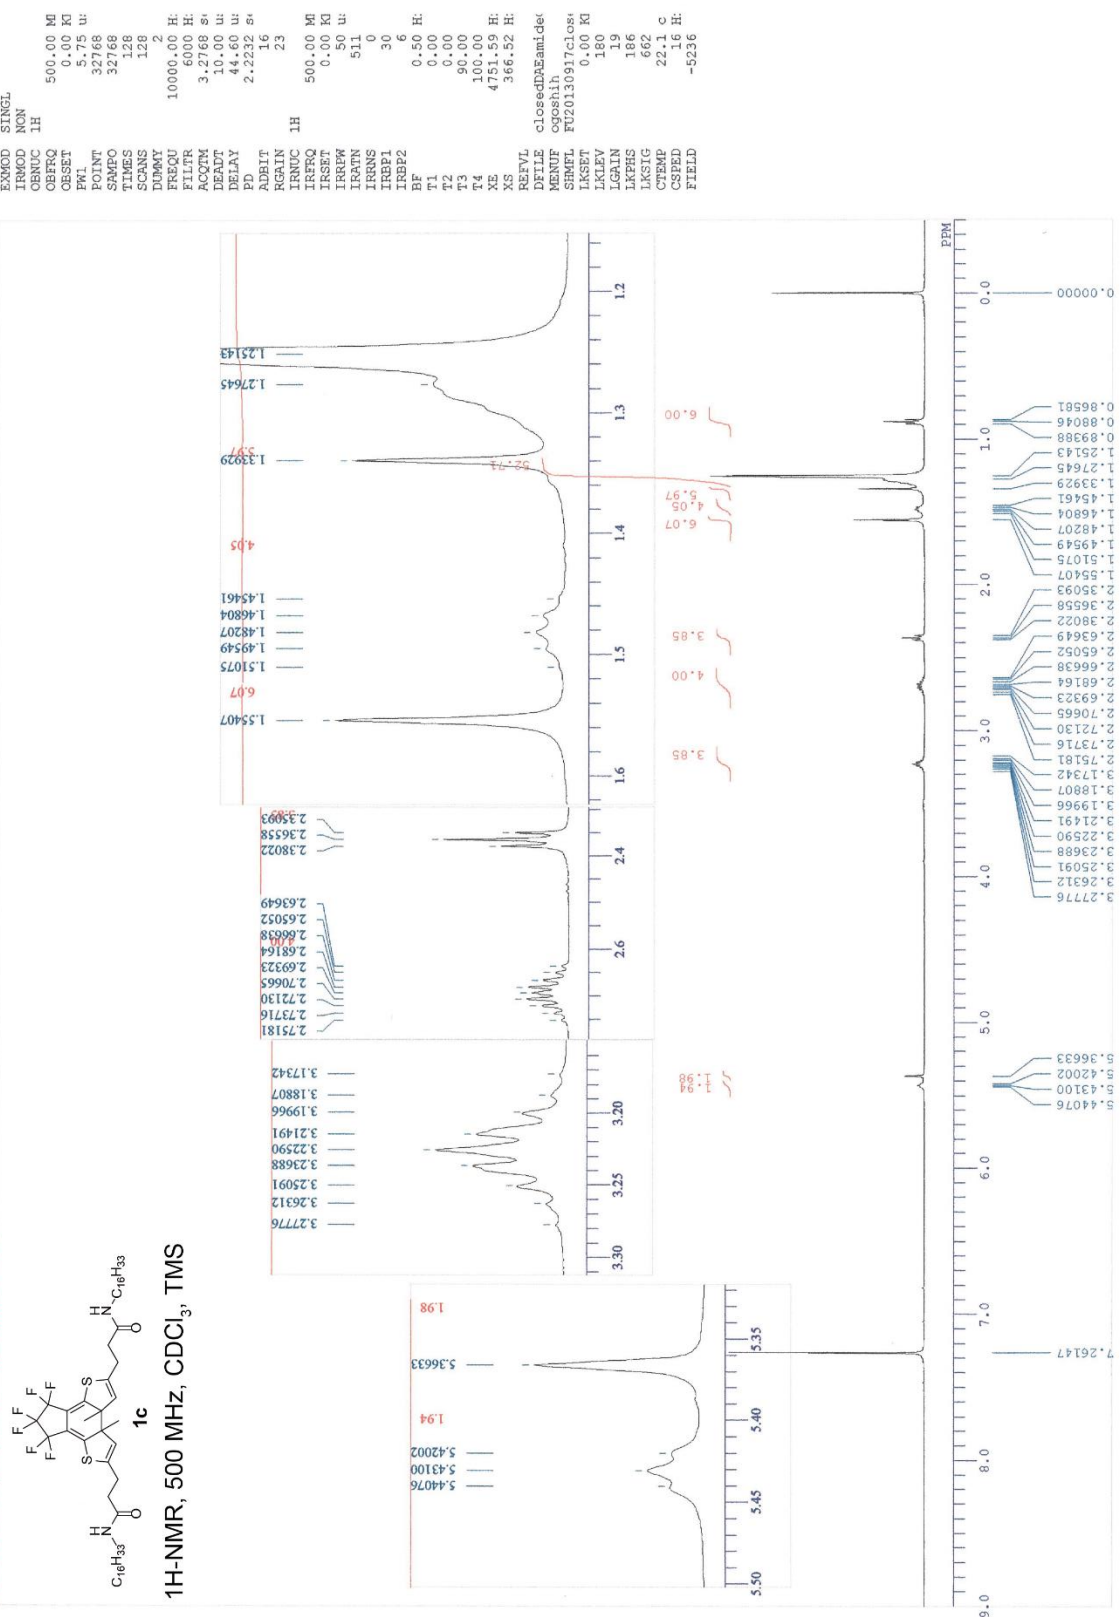

Fig. S23  $^1H$  NMR spectra of compound **1c** ( $CDCl_3$ , 500 MHz)

## References

- [S1] S.-R. Deng, T. Wu, G.-Q. Hu, D. Li, Y.-H. Zhou and Z.-Y. Li, *Synth. Commun.*, 2007, **37**, 71.
- [S2] T. Fukaminato, T. Kawai and M. Irie, *Proc. Jpn. Acad. Ser. B*, 2001, **77**, 30.
- [S3] G. Tóth and K. E. Kövér, *Synth. Commun.*, 1995, **25**, 3067.
- [S4] D. Zhao and J. S. Moore, *Org. Biomol. Chem.*, 2003, **1**, 3471.
